1

2

## Glutamine is essential for overcoming the

3

## immunosuppressive microenvironment in malignant salivary

4

## gland tumors

5

6 **Shuting Cao<sup>a</sup>, Yu-Wen Hung<sup>a, #</sup>, Yi-Chang Wang<sup>a, #</sup>, Yiyin Chung<sup>a, #</sup>, Yue Qi<sup>a, #</sup>,**  
7 **Ching Ouyang<sup>b</sup>, Xiancai Zhong<sup>c</sup>, Weidong Hu<sup>c</sup>, Alaysia Coblentz<sup>a</sup>, Ellie Maghami<sup>d</sup>,**  
8 **Zuoming Sun<sup>c, e</sup>, H. Helen Lin<sup>a</sup>, and David K. Ann<sup>a, e, \*</sup>**

9

10 <sup>a</sup>Department of Diabetes Complications and Metabolism, Arthur Riggs Diabetes and  
11 Metabolism Research Institute, Beckman Research Institute, City of Hope, Duarte, CA,  
12 91010, USA

13 <sup>b</sup>Department of Computational and Quantitative Medicine, Beckman Research  
14 Institute, City of Hope Comprehensive Cancer Center, Duarte, CA 91010, USA

15 <sup>c</sup>Department of Immunology and Theranostics, Beckman Research Institute, City of  
16 Hope Comprehensive Cancer Center, Duarte, CA 91010, USA

17 <sup>d</sup>Division of Head and Neck Surgery, City of Hope National Medical Center, Duarte,  
18 CA 91010, USA

19 <sup>e</sup>Irell & Manella Graduate School of Biological Sciences, Beckman Research Institute,  
20 City of Hope Comprehensive Cancer Center, Duarte, CA 91010, USA

21

22 **#Contribute equally**

23 **\*To whom all correspondence should be addressed:**

24 David K. Ann, Ph.D.

25 Beckman Research Institute

26 City of Hope Comprehensive Cancer Center

27 Duarte, CA 91010-3000

28 Tel: 626-218-4967

29 Fax: 626-471-7204

30 E-Mail: [dann@coh.org](mailto:dann@coh.org)

31

32 **Abstract**

33 **Rationale:** Immunosuppression in the tumor microenvironment (TME) is key to the  
34 pathogenesis of solid tumors. Tumor cell-intrinsic autophagy is critical for sustaining  
35 both tumor cell metabolism and survival. However, the role of autophagy in the host  
36 immune system that allows cancer cells to escape immune destruction remains poorly  
37 understood. Here, we determined if attenuated host autophagy is sufficient to induce  
38 tumor rejection through reinforced adaptive immunity. Furthermore, we determined  
39 whether dietary glutamine supplementation, mimicking attenuated host autophagy, is  
40 capable of promoting antitumor immunity.

41 **Methods:** A syngeneic orthotopic tumor model in *Atg5<sup>+/+</sup>* and *Atg5<sup>fllox/fllox</sup>* mice was  
42 established to determine the impact of host autophagy on the antitumor effects against  
43 mouse malignant salivary gland tumors (MSTs). Multiple cohorts of immunocompetent  
44 mice were used for oncoimmunology studies, including inflammatory cytokine levels,  
45 macrophage, CD4<sup>+</sup>, and CD8<sup>+</sup> cells tumor infiltration at 14 days and 28 days after MST  
46 inoculation. *In vitro* differentiation and *in vivo* dietary glutamine supplementation were  
47 used to assess the effects of glutamine on Treg differentiation and tumor expansion.

48 **Results:** We showed that mice deficient in the essential autophagy gene, *Atg5*,  
49 rejected orthotopic allografts of isogenic MST cells. An enhanced antitumor immune  
50 response evidenced by reduction of both M1 and M2 macrophages, increased  
51 infiltration of CD8<sup>+</sup> T cells, elevated IFN- $\gamma$  production, as well as decreased inhibitory  
52 Tregs within TME and spleens of tumor-bearing *Atg5<sup>fllox/fllox</sup>* mice. Mechanistically,  
53 ATG5 deficiency increased glutamine level in tumors. We further demonstrated that  
54 dietary glutamine supplementation partially increased glutamine levels and restored  
55 potent antitumor responses in *Atg5<sup>+/+</sup>* mice.

56 **Conclusions:** Dietary glutamine supplementation exposes a previously undefined  
57 difference in plasticity between cancer cells, cytotoxic CD8<sup>+</sup> T cells and Tregs.

58

59 **Key words:** autophagy, tumor microenvironment, glutamine, CD8, Treg

60

## 61 **Introduction**

62 Accumulating evidence suggests that the modulation of immune microenvironment  
63 plays a critical role in anti-cancer immunity by regulating both tumor immune  
64 surveillance and evasion [reviewed in [1-3]]. Notably, the immunosuppressive  
65 networks promote cancer progression, metastasis and resistance to therapies [1].  
66 Salivary gland tumors have more than 30 subtypes, among them, salivary duct  
67 carcinoma (SDC), albeit rare, represents the most lethal and aggressive histologic  
68 subtype [4]. A recent study by Linxweiler et al. compared the immune landscape of  
69 malignant salivary gland tumors (MSTs) and revealed a significantly higher overall  
70 immune score [5]. In addition, several groups reported that MSTs exhibit higher levels  
71 of cytotoxic T lymphocyte (CTL) dysfunction (epitomized by overexpression of immune  
72 checkpoint genes) and an abundance of immune-suppressive cell types (exemplified  
73 by regulatory T cells [Tregs]) [6-10]. Thus, MSTs have evolved strategies to module  
74 the immune microenvironment to evade antitumor immune response.

75 Accumulating evidence has suggested the involvement of the various nutrients in  
76 regulating the survival, apoptosis, differentiation, activation, effector function and tumor  
77 trafficking of immune cell subsets [11-13]. For example, during T-cell differentiation,  
78 CD4<sup>+</sup> and CD8<sup>+</sup> cells are generated from naïve T cells through distinct glucose-  
79 mediated activation of effector function and clonal selection [12]. CD8<sup>+</sup> T cells are the  
80 preferred immune cells for targeting cancer cells for immunogenic cell death [14, 15].  
81 In parallel, the naïve T cells, activated by antigen-presenting cells and specific  
82 cytokines, differentiate into CD4<sup>+</sup> effector cells (T helper cells and Th17 cells) as well  
83 as Tregs [11, 16]. Notably, Treg cells exhibited increased fatty acid oxidation, whereas  
84 Th17 cells have demonstrated a reliance upon fatty acid synthesis [17]. Tregs appear  
85 to play a major role in suppressing antitumor immune responses [18]. The precise  
86 nutrient utilization pathways regulating Treg functions and the crosstalk between  
87 different T lymphocyte subsets to govern antitumor immunity remains unclear.

88 Autophagy recycles cargos to provide anabolic and catabolic substrates [19]. This  
89 metabolic recycling function of autophagy promotes tumor cell survival under  
90 conditions of nutrient limitation [20]. Furthermore, autophagy may favor tumor  
91 progression by promoting the escape of malignant cells from immune surveillance [21-  
92 25]. Autophagosome formation during autophagy involves various autophagy-related  
93 genes (*Atgs*), including *Atg5* [26]. Indeed, elevated *Atg5* expression is an unfavorable  
94 prognostic marker for human renal and hepatic cancers (The Human Protein Atlas;  
95 [27]). Moreover, autophagy plays a key role in shaping T cell immunity and activation  
96 [28, 29]. During the process of activation and differentiation to effectors, T cells  
97 undergo metabolic reprogramming and shift from anabolic to catabolic mode [30].

98 Autophagy has emerged as a crucial regulator of T cell catabolic activity [31]. Deletion  
99 of *Atg7*, *Atg5* or *Atg3* impairs CD4<sup>+</sup> and CD8<sup>+</sup> T cell proliferation and function in  
100 knockout mice [28, 32, 33], whereas deletion of *Atg7* or *Atg5* leads to Treg depletion  
101 and greater antitumor response [34]. Autophagy also promotes invariant natural killer  
102 T (iNKT) cells and Tregs differentiation in the thymus [35]. Hence, autophagy regulates  
103 the dynamic nature of antitumor immunity and homeostasis.

104 To determine whether autophagy changes impact tumor progression, most reports  
105 were centered on how tumors exploit their intrinsic autophagy competency to survive  
106 antitumor immunity in the hostile tumor microenvironment (TME) [36, 37]. In contrast,  
107 our limited understanding of the effect of host autophagy on the function and integrity  
108 of immune mediators that promote tumor progression versus mediators that promote  
109 tumor rejection is mainly derived from *in vitro* immune cell culture systems and  
110 therefore limited. In other words, mechanisms by which host autophagy stimulates or  
111 limits the immune system for recognizing and fighting tumor cells in tumor rejection  
112 remain unclear [38, 39]. Here we utilized an *in vivo* model in which both autophagy-  
113 attenuated *Atg5<sup>flox/flox</sup>* and autophagy-competent *Atg5<sup>+/+</sup>* mice were orthotopically  
114 allografted with syngeneic MST cells [40] to examine the role of attenuated host  
115 autophagy in regulating antitumor immune response within TME. For the first time, we  
116 present evidence that autophagy was associated with a reduction in intratumor  
117 glutamine level and suppressed cytotoxic T lymphocyte activity, favoring MST  
118 progression. Lastly, dietary glutamine supplementation retarded tumor growth and  
119 enhanced host antitumor immunity. Our findings provide a rationale for dietary  
120 glutamine supplementation as a therapeutic strategy to exploit the metabolic  
121 vulnerability of T cells against MST.

## 122 **Material and Methods**

### 123 **Mice breeding**

124 All animal protocols were in accordance with the guideline of Institutional Animal Care  
125 and Use Committee at City of Hope (IACUC 06038). Mice were housed in a specific  
126 pathogen-free room with a 12-h light/dark cycles and were fed an autoclaved chow  
127 diet and water *ad libitum*. *LGL-KRAS<sup>G12V</sup>* mice, *Ela-CreERT* mice, and *Atg5<sup>flox/flox</sup>* mice  
128 [13] were crossed to derive *Ela-CreERT;LGL-KRAS<sup>G12V</sup>;Atg5<sup>flox/flox</sup>*  
129 (*KRAS<sup>G12V</sup>;Atg5<sup>flox/flox</sup>*), and *Ela-CreERT;LGL-KRAS<sup>G12V</sup>;Atg5<sup>+/+</sup>* (*KRAS<sup>G12V</sup>; Atg5<sup>+/+</sup>*)  
130 mice, as we described previously [40]. Genotyping was conducted as described  
131 previously [41, 42]. Adult male mice, 8-10 weeks of age, were used in all experiments.

### 132 **Diet**

133 All mice were kept on normal chow until start of the experiments. Diets used in this  
134 study are based on the open standard diet with 16 %kcal fat with crystalline amino  
135 acids from Research Diets Inc. (New Brunswick, NJ, USA). The Control diet  
136 (A11112201) contained all essential amino acids and nonessential amino acids as  
137 specified by Research Diets. Glutamine-supplemented diet contained all amino acids  
138 equal to the control diet with the addition of 200 g of glutamine by Ishak Gabra [43].  
139 Corn starch content was adjusted to achieve the isocaloric intake. Mice were fed with  
140 respective diets for 28 days. Glutamine concentration was determined in the collected  
141 serum and harvested submandibular glands (SMGs), respectively.

### 142 **Tumor digests and submandibular glands tumor cells isolation**

143 Tumors were cut into small pieces and digested into single cell suspension as  
144 previously described [40]. The tumors were minced and digested up to 60 min at 37 °C  
145 in digestion medium containing collagenase (1 mg/ml; MilliporeSigma, C6885),  
146 hyaluronidase (100 units/ml; MilliporeSigma, H3506), DNase I (50 µg/ml;  
147 MilliporeSigma, D4527), bovine serum albumin (1 mg/ml; MilliporeSigma, A2153),  
148 HEPES (pH 7.3, 20 mM; Corning, 25-060-CI) in Dulbecco's Modified Eagle's  
149 Medium/Ham's F-12 50/50 Mix (Corning, 16-405-CV). The suspension of digested  
150 tumor cells was passed through a 100 µm sieve to remove the remaining tissue  
151 chunks. The red blood cells were lysed by incubating cell suspensions in 1X red blood  
152 cell lysis buffer (155 mM NH<sub>4</sub>Cl, 12 mM NaHCO<sub>3</sub>, 0.1 mM EDTA, pH 7.3) for 3 min on  
153 ice.

### 154 **Primary tumor cell culture**

155 The primary cells were plated on collagen I-coated dishes (Corning, 354450), and  
156 maintained in a medium consisting of Dulbecco's Modified Eagle's Medium (Corning,  
157 10-013-CV) with fetal bovine serum (10%; Thermo Fisher Scientific, 10437028), L-

158 glutamine (5 mM; Thermo Fisher Scientific, A2916801), hydrocortisone (400 ng/ml;  
159 MilliporeSigma, H0888), insulin (5  $\mu$ g/ml; Thermo Fisher Scientific, 12585014), EGF  
160 (20 ng/ml; Thermo Fisher Scientific, PHG0311), HEPES (15 mM; Thermo Fisher  
161 Scientific, 15630080) and antibiotic-antimycotic (1X; Thermo Fisher Scientific,  
162 15240112). After 1 to 2 week of incubation, colonies of the GFP-negative tumor cells  
163 were manually picked and transfer to new cell culture dishes.

#### 164 **Orthotopic tumor implantation**

165 To distinguish host genotypes from genotypes of inoculated tumor cells, the tumor cells  
166 collected from *KRAS<sup>G12V</sup>; Atg5<sup>+/+</sup>* and *KRAS<sup>G12V</sup>; Atg5<sup>flox/flox</sup>* tumor-bearing mice were  
167 designated as *KRAS<sup>G12V</sup>; Atg5<sup>+/+</sup>* and *KRAS<sup>G12V</sup>; Atg5 <sup>$\Delta/\Delta$</sup>* , respectively. Whereas host  
168 genotypes were designated as *Atg5<sup>+/+</sup>* and *Atg5<sup>flox/flox</sup>*. *Atg5<sup>+/+</sup>* and *Atg5<sup>flox/flox</sup>* mice were  
169 orthotopically inoculated with  $2 \times 10^5$  MST cells (*KRAS<sup>G12V</sup>; Atg5<sup>+/+</sup>* and  
170 *KRAS<sup>G12V</sup>; Atg5 <sup>$\Delta/\Delta$</sup>* ), suspended in DMEM/Matrigel (1:1), in the right (SMGs). Tumor  
171 sizes were measured at least three times a week with digital calipers and tumor volume  
172 was calculated using the formula Volume ( $\text{mm}^3$ ) =  $(W^2 \times L)/2$ , where W (width) and L  
173 (length) correspond to the smaller and larger of two perpendicular axes, respectively.  
174 Animals were euthanized post-tumor implantation at either early end-point (Day 14) or  
175 late end-point (Day 25) according to humane endpoints as specified by COH IACUC  
176 guideline. For high glutamine diet feeding experiments,  $5 \times 10^4$  MST cells were  
177 implanted in SMG of mice. Tumor-bearing mice were fed with regular or high glutamine  
178 diet for another 21 days. Diets were changed weekly, and the consumption of diets  
179 were measured. Tumor-bearing mice were euthanized at 21 days post-tumor  
180 implantation.

#### 181 **LPS treatment**

182 Naïve mice were intraperitoneal injected with 5 mg/kg body weight lipopolysaccharides  
183 (LPS; MilliporeSigma, LPS25) in PBS or equal volume of PBS. Six hours following LPS  
184 administration, spleens were harvested, and spleen weights measured.

#### 185 **Tissue preparation and characterization**

186 Tumors were excised and fixed in 10% neutral-buffered formalin (MilliporeSigma,  
187 HT501128) for 48 h. Tissue embedding, sectioning, and staining with modified Mayer's  
188 hematoxylin (American MasterTech, HXMMHGAL) and eosin Y stain (American  
189 MasterTech, STE0157), or H&E stain, were performed in City of Hope Pathology Core  
190 as previous described [40].

#### 191 **Immunohistochemistry and quantification**

192 The immunohistochemistry (IHC) was performed by City of Hope Pathology Core as  
193 described previously [40-42]. Briefly, formalin fixed paraffin embedded (FFPE) tumor  
194 tissue slides were deparaffinized and hydrated through xylenes and graded alcohol  
195 solutions. The tissue slides were pressure-cooked in citrate-based unmasking solution  
196 for 30 min and washed in phosphate-buffered saline for 5 min, followed by quenching  
197 of endogenous peroxidase activity in H<sub>2</sub>O<sub>2</sub> (0.3%; MilliporeSigma, H1009) for 30 min.  
198 The slides were then blocked for 20 min with a mixture of Avidin D solution and diluted  
199 normal blocking serum, which was prepared from the species in which the secondary  
200 antibody is made. The slides were then incubated with a mixture of primary antibody  
201 and biotin solution for 30 min and washed in buffer 3 times. The slides were incubated  
202 in the Vector biotinylated secondary antibody for 30 min, washed for 5 min, and then  
203 incubated in Vectastain Elite ABC Reagent for 30 min. After being washed for 5 min,  
204 the slides were processed with the DAB Substrate Kit. Primary antibodies for IHC  
205 include antibody recognizing Ki67 (abcam, ab15580), F4/80 (Bio-Rad, MCA497R),  
206 CD11b (Abcam, ab133357), CD4 (Biolegend, 201501), CD8 (Thermo Fisher, 14-0808-  
207 82). For quantification, 10x magnification images of 5 nonoverlapping fields of tumors  
208 (5 images per mouse) were quantified using Image-Pro Premier 9.02 (Media  
209 Cybernetics).

#### 210 **qRT-PCR**

211 RNA was extracted using Trizol (Invitrogen, 15596026) according to the  
212 manufacturer's instructions. The concentration of the isolated RNA and the ratio of  
213 absorbance at 260 nm to 280 nm (A<sub>260</sub>/A<sub>280</sub> ratio) were measured with  
214 spectrophotometer (Biotek). cDNA was generated using iScript Kit (Bio-Rad, 1708890)  
215 and the qRT-PCR reaction utilized the components contained in the iTaq Universal  
216 SYBR Green Supermix (Bio-Rad, 1725120). Household gene transcript levels (*Gapdh*)  
217 were used for normalization. The 2- $\Delta\Delta$ Ct method was used to analyze the relative  
218 changes in each target gene expression [44]. Sequences of the primers are listed in  
219 Table S1.

#### 220 **Immunoblotting**

221 Whole tissue protein was extracted by Qproteome Mammalian Protein Prep Kit  
222 (Qiagen, 37901) according to the manufacture's guidelines. Cell lysates were prepared  
223 by directly lysing cells in 1X Laemmli SDS-PAGE buffer with vortexing and heating at  
224 95 °C for 10 min. The protein concentration was measured by Bicinchoninic acid assay.  
225 Western blotting was performed by running equal amount of protein on a SDS-PAGE  
226 gel and immunoblotted with primary antibodies of interest followed by horseradish  
227 peroxidase conjugated secondary antibody following manufacturer's instruction. After

228 chemiluminescent reaction, blots were visualized with a Chemi-Doc Touch Imaging  
229 System (Bio-Rad).

### 230 **Multicolor flow cytometry**

231 Cell suspensions (splenocytes and SMG tumor cells) were stained in FACS buffer  
232 (PBS supplemented with 1% BSA) for 30 min on ice using the following antibodies:  
233 CD11b-APC-eFluor 780 (Invitrogen, 47-0112-80), F4/80-eFluor 450 (Invitrogen, 48-  
234 4801-80), MHCII-PerCP-eFluor 710 (Invitrogen, 46-5320-80), CD86-PE-Cyanine7  
235 (Invitrogen, A15412), CD206-PE (Invitrogen, 12-2061-82), Ly6b-APC (Novus, NBP2-  
236 13077APC), NK1.1-Super Bright 702 (Invitrogen, 67-5941-82), CD49b-APC  
237 (Invitrogen, 17-5971-81), CD4-PE-Cyanine7 (Invitrogen, 25-0041-81), and CD8-  
238 eFluor 450 (Invitrogen, 48-0081-80), diluted in FACS buffer at 1:100 ratio, whereas  
239 CD25-SB600 (Invitrogen, 63-0251-80) diluted in FACS buffer at 1:50 ratio. For  
240 intracellular cytokine staining, cells isolated from *Atg5<sup>+/+</sup>* and *Atg5<sup>flox/flox</sup>* mice were  
241 treated with 50 ng/ml PMA, 750 ng/ml ionomycin (both from Sigma-Aldrich), and  
242 GolgiPlug (BD Biosciences) in complete medium at 37 °C for 4-6 h. Cells were fixed  
243 and permeabilized with TF Fixation/Permeabilization solution (Invitrogen) before  
244 interferon gamma (IFN- $\gamma$ )-APC (Invitrogen, 17-7311-81, 1:160 dilution) staining, and  
245 Foxp3-PE-Cy7 (Invitrogen, 25-5773-82, 1:80 dilution) staining, respectively.  
246 LIVE/DEAD™ Fixable Aqua Dead Cell Stain Kit (Invitrogen, L34957) was used to  
247 distinguish live and dead cells. Dead cells and doublets were excluded from all  
248 analysis. Multiparameter analysis was performed on Attune NxT Acoustic flow  
249 cytometer (Invitrogen) and analyzed with the FCS express 7 software (De Novo  
250 Software, Glendale, CA).

### 251 **CD4<sup>+</sup> T cell isolation and *in vitro* iTreg differentiation**

252 Naïve mouse CD4<sup>+</sup> T cells were isolated from spleens of *Atg5<sup>+/+</sup>* and *Atg5<sup>flox/flox</sup>* mice  
253 using Naïve CD4<sup>+</sup> T Cell Isolation Kit (Miltenyi Biotec, 130-104-453). Cells ( $5 \times 10^5$   
254 cells in one milliliter per well) were seeded in 24-well plate pre-coated with 0.05 mg/ml  
255 goat anti-hamster antibody (MP Biomedicals) at 4°C overnight. iTreg induction medium  
256 is glutamine-free RPMI 1640 supplemented with 10% fetal bovine serum (FBS, Gibco),  
257 2-mercaptoethanol (50  $\mu$ M), penicillin (100 U/ml), streptomycin (100  $\mu$ g/ml, Corning),  
258 hamster anti-CD3 (0.25  $\mu$ g/ml, eBioscience, 145-2C11), hamster anti-CD28 (1  $\mu$ g/ml,  
259 eBioscience, 37.51), TGF- $\beta$  (3 ng/ml, Peprotech), and mIL-2 (100 U/ml, Biolegend).  
260 Fresh media with escalating concentrations of glutamine were replenished every day  
261 for 3 days. Cells were then stained with viability dye, CD4, CD25, Foxp3, and followed  
262 by flow cytometric analysis.

### 263 **Tumor tissue and plasma glutamine quantification**



264 Glutamine extraction and quantification from tumor tissue was modified from method  
265 by Pan et al. [45]. Approximately 50 mg of fresh tumor tissues were homogenized in  
266 ice cold 70% ethanol using TissueLyser II (Qiagen). After spinning down, the pellet  
267 was collected and dried using SpeedVac vacuum concentrator. The dried pellet was  
268 then resuspended in phosphate buffer (20 mM, pH 7.2, 500  $\mu$ l) and centrifuged to  
269 remove debris. The supernatant (400  $\mu$ l) was transferred and dried with speed  
270 vacuum. Subsequently, the dried pellet was dissolved in 550  $\mu$ l D<sub>2</sub>O containing 0.01  
271 mg/ml Sodium 2,2-Dimethyl-2-Silapentane-5-Sulfonate (DSS; Cambridge Isotope).  
272 The samples were then vortexed and centrifuged at 16000 rpm for 12 min. 500  $\mu$ l  
273 solution was transferred to NMR tube. The NMR experiments were carried out at 25°C  
274 on a Bruker 700 MHz Avance spectrometer equipped with cryoprobe. To suppress  
275 residual macromolecule signals, a Carr-Purcell- Meiboom-Gill (CPMG) sequence with  
276 Periodic Refocusing Of J Evolution by Coherence Transfer (PROJECT) method [46]  
277 and pre-saturation was used to acquire the 1D <sup>1</sup>H data. The spectrum width is 13.4  
278 ppm, the recycle delay, acquisition time are 1.5 and 3.5 seconds, respectively. The  
279 CPMG duration is 250 ms with 52 echoes and 1.2 ms delay between pulses in the  
280 CPMG echo. A control sample with known concentration of glutamine and glutamate  
281 and internal reference DSS was prepared to determine the CPMG effect on the peak  
282 intensity of glutamine and glutamate. The glutamine and glutamate concentration from  
283 tissue extractions was first determined using Chenomx software, and then adjusted by  
284 taking account of CPMG effect. Glutamine concentration of the plasma samples was  
285 measured by EnzyChrom Glutamine Assay Kit (BioAssay Systems, EGLN-100)  
286 following the protocol of the manufacturer. Mouse plasma was collected and diluted  
287 two-fold in PBS. To 30  $\mu$ l of diluted plasma, 15  $\mu$ l of inactivation solution (0.6 N HCl)  
288 was added, mixed, and incubated for 5-10 min at room temperature. Then 15  $\mu$ l of Tris  
289 solution (600 mM, pH 8.5) was added and proceeded with the EnzyChrom Assay.

#### 290 **$\alpha$ KG extraction and measurement**

291 Alpha-ketoglutarate ( $\alpha$ KG) extraction from tumor tissue was as described above.  $\alpha$ -  
292 ketoglutarate was quantified using  $\alpha$ KG Assay Kit (Abcam, ab83431) following the  
293 manufacture's protocol.

## 294 Results

### 295 Attenuated autophagy is sufficient for the suppression of MSTs.

296 To investigate the role of autophagy in regulating MST progression at various stages,  
297 we developed an inducible  $KRAS^{G12V};Atg5^{flox/flox}$  mouse model with an ability for  
298 conditional activation of oncogenic  $KRAS^{G12V}$  and disruption of the essential autophagy  
299 protein ATG5 in submandibular glands (SMGs) [40-42]. We showed that ATG5-  
300 knockout tumors grow more slowly during late tumorigenesis, despite a faster onset  
301 [40]. MST cells were isolated from both  $KRAS^{G12V};Atg5^{+/+}$  and  $KRAS^{G12V};Atg5^{\Delta\Delta}$  tumors,  
302 respectively for biochemical analyses (**Fig. S1A**). In  $KRAS^{G12V};Atg5^{\Delta\Delta}$  tumor cells, the  
303 *Atg5* expression was ablated and the conversion of microtubule-associated protein  
304 1A/1B-light chain 3 (LC3)-I to the lipidated form of LC3B-II was lower than  
305  $KRAS^{G12V};Atg5^{+/+}$  MSC cells (**Fig. S1B**), supporting the deletion of ATG5. Next, to  
306 investigate the effect of host *Atg5* genotype on autophagy competency, we compared  
307 autophagy parameters between SMGs and spleens from naïve  $Atg5^{+/+}$  and  $Atg5^{flox/flox}$   
308 mice. As shown in **Fig. 1A**, a reduction, but not depletion, of ATG5-ATG12 and an  
309 accumulation of LC3-I confirmed the attenuated autophagy in SMGs and spleens from  
310 naïve  $Atg5^{flox/flox}$  mice. Autophagy plays a crucial role in modulating immune system  
311 homeostasis [21-25]. Several key autophagy components participate in the immune  
312 and inflammatory processes; more specifically, the ATG5-ATG12 conjugate is  
313 associated with innate antiviral immune responses [47, 48]. Consistent with this, the  
314 basal expression of proinflammatory cytokine genes, *Il-6*, *Il-1 $\alpha$* , *Il-1 $\beta$* , *Tnf $\alpha$* , *Irfn- $\gamma$*  and  
315 *p21*, was significantly higher in SMGs of naïve  $Atg5^{flox/flox}$  mice when compared to  
316 SMGs of naïve  $Atg5^{+/+}$  mice (**Fig. 1B**).

317 Next, we hypothesized that an attenuated host autophagy is a barrier for tumor  
318 progression in SMGs. To test this possibility, we investigated host tumor  
319 microenvironment following the inoculation of  $KRAS^{G12V};Atg5^{+/+}$  and  $KRAS^{G12V};Atg5^{\Delta\Delta}$   
320 tumor cells, respectively, into different genotypic recipient mice ( $Atg5^{+/+}$  and  $Atg5^{flox/flox}$ ;  
321 **Fig. 1C**). There was no noticeable difference in tumor expansion between  
322  $KRAS^{G12V};Atg5^{+/+}$  and  $KRAS^{G12V};Atg5^{\Delta\Delta}$  tumor cells in host with the same genotype  
323 (lane 1 vs lane 2, lane 3 vs lane 4; **Fig. S1C**). We therefore chose to use  
324  $KRAS^{G12V};Atg5^{\Delta\Delta}$  tumor cells in the subsequent studies for consistency. Tumors  
325 derived from the inoculated MST cells exhibited similar histopathological features as  
326 the endogenous tumors (**Fig. S1D**). In contrast, a significant reduction in tumor growth,  
327 starting from Day 16 following tumor cell inoculation was observed in  $Atg5^{flox/flox}$   
328 recipient mice, compared to  $Atg5^{+/+}$  recipient mice (**Fig. 1D**). Accordingly, SMG tumor  
329 weights from  $Atg5^{flox/flox}$  recipient mice were significantly lower than those from  $Atg5^{+/+}$   
330 recipient mice at the later time-point when tumors were harvested (**Fig. 1E, F, S1C**).

331 H&E staining shows that tumors from *Atg5<sup>flox/flox</sup>* recipient mice often exhibited reduced  
332 progression as normal salivary tissues were abundantly detected within SMGs,  
333 whereas the SMGs from *Atg5<sup>+/+</sup>* recipient mice had fewer regions displaying normal  
334 salivary tissues at Day 14 and Day 25 post-MST cell inoculation (**Fig. 1G**). Consistently,  
335 a decrease in the proliferation marker, Ki-67, was observed in SMGs from tumor-  
336 bearing *Atg5<sup>flox/flox</sup>* mice compared to those SMG from tumor-bearing *Atg5<sup>+/+</sup>* mice (**Fig.**  
337 **1G, H**). Of note, tumor growth prior to Day 16 was indistinguishable between two host  
338 genotypes (**Fig. 1D**). However, tumor volume between recipient hosts consistently  
339 diverged after Day 16. At this point, continued growth was noted only in tumor-bearing  
340 *Atg5<sup>+/+</sup>* mice. In contrast, tumor regression was seen in tumor-bearing *Atg5<sup>flox/flox</sup>* mice.  
341 These findings underscore the importance of antitumor immune response in a host  
342 autophagy-specific manner. Subsequent studies were focused on analyzing the TME  
343 residents in tumor-bearing *Atg5<sup>+/+</sup>* mice and *Atg5<sup>flox/flox</sup>* mice on Day 14 and on Day 25,  
344 respectively.

#### 345 **Attenuated autophagy suppresses macrophages expansion within TME.**

346 Next, we hypothesized that attenuated autophagy promotes antitumor immunity by  
347 affecting the infiltrated cell populations in SMGs. To test this hypothesis, we sought to  
348 examine whether autophagy regulates TME residents in our orthotopic syngeneic  
349 mouse MST model. Based on our observations of a marked infiltration of inflammatory  
350 cells, including macrophages and leukocytes in inducible MSTs [41] and elevated  
351 proinflammatory cytokines in naïve *Atg5<sup>flox/flox</sup>* mice (**Fig. 1B**), we first analyzed and  
352 compared leukocytes between tumor-bearing *Atg5<sup>+/+</sup>* and *Atg5<sup>flox/flox</sup>* mice. Flow  
353 cytometry analyses of CD11b<sup>+</sup>CD49b<sup>+</sup>NK1.1<sup>+</sup> NK cells (**Fig. S2A**) and CD11b<sup>+</sup>F4/80<sup>-</sup>  
354 Ly6B<sup>+</sup> neutrophils (**Fig. S2B**) showed that the frequencies of NK cells and neutrophils  
355 within the harvested tumor-harboring SMGs at Day 14 post-tumor cell implantation  
356 were not host genotype-dependent (**Fig. S2C, D**). At Day 25, NK cell frequency  
357 remained the same between different hosts (**Fig. S2E**). However, there was a  
358 significant decrease in neutrophils in spleens, a major secondary organ in the immune  
359 system, but not SMGs of tumor-bearing *Atg5<sup>flox/flox</sup>* mice at Day 25 (**Fig. S2F**).

360 We next characterized tumor-associated macrophages (TAMs). Circulating  
361 monocytes give rise to mature macrophages that are recruited into the TME and  
362 differentiate *in situ* into TAMs upon activation [49]. TAMs are further classified into  
363 classically activated or pro-inflammatory M1 and alternatively activated or anti-  
364 inflammatory M2 macrophages [50]. We evaluated the correlation between the  
365 autophagy capacity and the abundance of macrophage F4/80 marker in SMGs of  
366 *Atg5<sup>+/+</sup>* and *Atg5<sup>flox/flox</sup>* recipient mice using immunohistochemistry (IHC). As shown in

367 **Fig. 2A**, a decrease in infiltrating F4/80 counts in SMGs of tumor-bearing *Atg5<sup>flox/flox</sup>*  
368 mice at both Day 14 and Day 25 was noted. Flow cytometry analyses further revealed  
369 that the percentages of CD11b<sup>+</sup>F4/80<sup>+</sup>MHCII<sup>+</sup>CD86<sup>+</sup> M1 and CD11b<sup>+</sup>F4/80<sup>+</sup>MHCII<sup>-</sup>  
370 CD206<sup>+</sup> M2 macrophages in SMGs and spleens (controls) at Day 14 were not host-  
371 dependent (**Fig. 2B, C**). Given that tumor burden at Day 25 was higher in SMGs of  
372 *Atg5<sup>+/+</sup>* mice than *Atg5<sup>flox/flox</sup>* counterparts (**Fig. 1D**), *Atg5<sup>+/+</sup>* SMGs had increased M1  
373 and M2 macrophage infiltrate compared to *Atg5<sup>flox/flox</sup>* SMGs at Day 25 (**Fig. 2D**).  
374 Further, M1 and M2 populations were significantly higher in spleens of tumor-bearing  
375 *Atg5<sup>+/+</sup>* and *Atg5<sup>flox/flox</sup>* mice at Day 25 (**Fig. 2E**). Spleen-derived macrophages were  
376 readily polarized into M1 and M2 states, presumably via the tumor-spleen signaling  
377 interaction of IFN- $\gamma$  or other cytokines [51, 52]. Together, our data suggests that  
378 autophagy promotes the expansion of both M1 and M2 TAMs in SMGs of tumor-  
379 bearing *Atg5<sup>+/+</sup>* recipient mice at the later stage post-tumor cell inoculation.

### 380 **Attenuated autophagy promotes tumor-infiltrating cytotoxic CD8<sup>+</sup> T cells and** 381 **IFN- $\gamma$ production.**

382 Cancer immune evasion is a major stumbling block for antitumor immunity. We further  
383 elucidated the role of autophagy in regulating the infiltration of cytotoxic T lymphocytes  
384 into tumors. To achieve this goal, we first focused on CD4<sup>+</sup> helper and CD8<sup>+</sup> cytotoxic  
385 T lymphocytes. At Day 14 post-tumor cell implantation, there was no significant  
386 difference in the frequency of infiltrating CD8<sup>+</sup> T cells between SMGs of tumor-bearing  
387 *Atg5<sup>+/+</sup>* and *Atg5<sup>flox/flox</sup>* mice by IHC (**Figs. 3A**). However, a clear increase in the  
388 percentage of infiltrating CD4<sup>+</sup> and CD8<sup>+</sup> T cells was detected in SMGs of tumor-  
389 bearing *Atg5<sup>flox/flox</sup>* mice at Day 25 by IHC (**Fig. 3A**). Consistently, flow cytometry (**Fig.**  
390 **3B, C**) confirmed a higher percentage of CD8<sup>+</sup> T cells in SMGs (**Fig. 3D, F, left panels**)  
391 and spleens (**Fig. 3E, G, left panels**), respectively, in tumor-bearing *Atg5<sup>flox/flox</sup>* mice at  
392 both Day 14 (**Fig. 3D, E**) and Day 25 (**Fig. 3F, G**). Conversely, the host autophagy  
393 capacity did not affect percentages of CD4<sup>+</sup> T cells in SMGs and spleens from tumor-  
394 bearing mice at Day 14 (**Fig. 3D, E, right panels**) and Day 25 (**Fig. 3F, G, right panels**).  
395 We conclude that the increased infiltrating CD8<sup>+</sup> cytotoxic T cells play a key role in the  
396 observed antitumor phenotypes in tumor-bearing *Atg5<sup>flox/flox</sup>* mice.

397 IFN- $\gamma$  is key to cellular immune responses and is secreted predominantly by  
398 activated lymphocytes, such as CD4<sup>+</sup> helper and CD8<sup>+</sup> cytotoxic T cells [53]. We next  
399 assessed expression of proinflammatory cytokine-related genes in SMGs from tumor-  
400 bearing recipient mice by qRT-PCR and found increased IFN- $\gamma$  expression in *Atg5<sup>flox/flox</sup>*  
401 recipient mice at both Day 14 and Day 25 (**Figs. 4A, B**). However, the IFN- $\gamma$  production  
402 by splenocytes from the naïve *Atg5<sup>+/+</sup>* and *Atg5<sup>flox/flox</sup>* mice challenged with

403 lipopolysaccharide (LPS), to stimulate the release of proinflammatory cytokines, were  
404 comparable (**Fig. 4C**). We conclude that different host autophagy capacity did not alter  
405 IFN- $\gamma$  production from splenocytes upon LPS challenge. Next, we treated isolated SMG  
406 resident cells and splenocytes with a leukocyte activation cocktail containing  
407 PMA/ionomycin/Golgiplug [54] to promote intracellular cytokines accumulations, and  
408 assessed IFN- $\gamma$ -production by flow cytometry (**Fig. S3A, B**). Notably, there was a  
409 significant increase in the frequency of IFN- $\gamma$ -producing cells in SMGs and spleens of  
410 tumor-bearing *Atg5<sup>flox/flox</sup>* mice at Day 25 (**Fig. 4E**), but not at Day 14 (**Fig. 4D**). Further,  
411 no changes in CD8<sup>+</sup>IFN- $\gamma$ <sup>+</sup> and CD4<sup>+</sup>IFN- $\gamma$ <sup>+</sup> populations in SMGs (**Fig. 4F**), and spleens  
412 (**Fig. 4G**) from *Atg5<sup>+/+</sup>* and *Atg5<sup>flox/flox</sup>* recipient mice were observed at Day 14. In  
413 contrast, *Atg5<sup>flox/flox</sup>* recipient mice had higher frequencies of CD8<sup>+</sup>IFN- $\gamma$ <sup>+</sup> cells in SMGs  
414 and spleens, respectively, at Day 25 (**Fig. 4H, I, left panels**). CD4<sup>+</sup>IFN- $\gamma$ <sup>+</sup> cells, albeit  
415 with reduced frequencies, were also higher in SMGs and spleens of *Atg5<sup>flox/flox</sup>* recipient  
416 mice (**Fig. 4H, I, right panels**). It is conceivable that the increased IFN- $\gamma$  production by  
417 cytotoxic CD8<sup>+</sup>IFN- $\gamma$ <sup>+</sup> cells improved the antitumor responses in SMGs of *Atg5<sup>flox/flox</sup>*  
418 recipient mice.

#### 419 **Glutamine-dependent regulation of Treg cells in SMGs and spleens.**

420 Subsets of T cells within TME play distinct roles in mediating antitumor immunity [55].  
421 Upon tumor antigen stimulation, naïve T cells are activated and differentiate into two  
422 broad classes of CD4<sup>+</sup> or CD8<sup>+</sup> T cells that have distinct effector mechanisms [12].  
423 One CD4<sup>+</sup> T cell subset, Tregs, dampens the antitumor immune response [18]. We  
424 next examined the effect of host autophagy capacity on Treg population within TME of  
425 *Atg5<sup>+/+</sup>* and *Atg5<sup>flox/flox</sup>* recipient mice. A lower count of CD4<sup>+</sup>CD25<sup>+</sup>Foxp3<sup>+</sup> Tregs in  
426 SMGs at Day 14 was detected in tumor-bearing *Atg5<sup>flox/flox</sup>* mice (**Fig. 5A, left panel**),  
427 while the Treg counts in spleens from mice with different host autophagy capacity were  
428 indistinguishable (**Fig. 5A, right panel**). Notably, **Fig. 5B** showed a significant decrease  
429 in Tregs in SMGs and spleens from tumor-bearing *Atg5<sup>flox/flox</sup>* mice at Day 25. During T  
430 cell activation, glutamine metabolism increases to meet rapid growth requirement [56].  
431 We have previously shown that autophagy deficiency contributes to reduced  
432 intracellular concentration of most amino acids except glutamine, the level of which  
433 increased in *KRAS<sup>G12V</sup>;Atg5 <sup>$\Delta$</sup>*  tumor cells [40]. Given that autophagy inhibition  
434 promotes glutamine uptake [57], we examined whether glutamine level regulates T cell  
435 differentiation into specific subtypes in SMGs of *Atg5<sup>+/+</sup>* and *Atg5<sup>flox/flox</sup>* recipient mice.  
436 Notably, both glutamine (**Fig. 5C, right panel**) and its metabolite  $\alpha$ -ketoglutarate ( $\alpha$ KG)  
437 (**Fig. 5D, right panel**) levels were higher in SMGs from tumor-bearing *Atg5<sup>flox/flox</sup>* mice  
438 at Day 14 comparing to tumor-bearing *Atg5<sup>+/+</sup>* mice. In contrast, there was no

439 difference in glutamine and  $\alpha$ KG detected in SMGs of naïve  $Atg5^{+/+}$  and  $Atg5^{flox/flox}$  mice  
440 (**Fig. 5C, D, left panels**). **Fig. 5E** showed that naïve T cells differentiated into Tregs in  
441 a reverse glutamine-dependent manner under Treg polarization conditions, suggesting  
442 that glutamine shortage would render a higher frequency of  $CD4^+CD25^+Foxp3^+$  Tregs.  
443 This finding was consistent with the decreased *Foxp3* expression in Tregs  
444 differentiated under increasing glutamine concentrations in polarization medium (**Fig.**  
445 **5F**). Interestingly, there was an increase in the frequency of IFN- $\gamma$  secreting  $CD4^+$  T  
446 cells derived from naïve T cells of  $Atg5^{flox/flox}$  mice at 24 h and 48 h in glutamine-  
447 replenished Treg polarization medium (**Fig. S4**). Conceivably, glutamine concentration  
448 in SMGs not only regulated Tregs population but also IFN- $\gamma$  secreting  $CD4^+$  T cells.  
449 Together, **Table 1** summarizes the comparison between tumor growth and TME  
450 residents from  $Atg5^{+/+}$  and  $Atg5^{flox/flox}$  recipient mice at Day 14 and Day 25. Tumors  
451 continued to grow in the  $Atg5^{+/+}$  recipient mice while tumors regressed in  $Atg5^{flox/flox}$   
452 recipient mice after 14 days following cell implantation. A statistically significant  
453 decrease in  $CD4^+$  subpopulation, Tregs, and an increase in  $CD8^+$  T cells were noted  
454 (**Table 1**), supporting the role of attenuated host autophagy in promoting antitumor  
455 immune responses in MST-bearing  $Atg5^{flox/flox}$  mice.

#### 456 **Dietary glutamine supplementation is sufficient to suppress MST.**

457 Next, we evaluated the effect of dietary glutamine supplementation on MST tumor  
458 growth. We used isocaloric diet with 20% additional glutamine (high glutamine diet)  
459 compared to control diet as reported by Ishak Gabra [43]. Supplementation of  
460 glutamine in the diet significantly increases the plasma concentration of glutamine in  
461 naïve  $Atg5^{+/+}$  mice (**Fig. 6A**). Furthermore, comparing to the  $Atg5^{+/+}$  mice fed with  
462 control diet, tumor glutamine level was elevated in the  $Atg5^{+/+}$  mice fed with high  
463 glutamine diet (**Fig. 6B**). These immunocompetent  $Atg5^{+/+}$  mice fed with high glutamine  
464 diet developed significantly smaller tumors after orthotopic tumor implantation (**Fig.**  
465 **6C**). H&E staining of the excised tumors from mice fed with high glutamine diet showed  
466 areas of residual normal glandular parenchyma (**Fig. S5**). IHC staining revealed that  
467 infiltrating cytotoxic  $CD8^+$  T cells were more notably abundant with overall less  $Foxp3^+$   
468 Tregs detected in tumor sections from high glutamine-fed mice (**Fig. 6D, upper 4**  
469 *panels*). Notably, tumor PD-L1 signals were moderately strong without clear spatial  
470 distribution or affected by high glutamine diet (**Fig. 6D, lower 4 panels**). Presumably,  
471 the increase in tumor-infiltrating  $CD8^+$  T cells is caused by the reduction of Tregs.  
472 Altogether, dietary intake of glutamine may effectively increase the concentration of  
473 glutamine in TME to suppress Treg differentiation, mimicking an autophagy-  
474 compromised TME (**Table 1**).

## 475 Discussion

476 Immune suppression and escape are increasingly recognized as critical traits of  
477 malignancy [58]. During cancer progression, autophagy may represent an important  
478 pathway for immune escape, while also promoting the malignant phenotype of cancer  
479 cells [59, 60]. The increasing interests in the role of compromised autophagy, in  
480 addition to undermining tumorigenesis, in controlling immune tolerance and bolstering  
481 tumor rejection [61], prompted us to develop a syngeneic orthotopic mouse tumor  
482 model for evaluating host autophagy capacity on MST progression. This novel  
483 syngeneic tumor model enables us to show for the first time that host ATG5-dependent  
484 autophagy promotes tumor progression by suppressing the antitumor immune  
485 response, independently of the autophagy genotypes of donor tumor cells. In other  
486 words, the attenuated host autophagy capacity ultimately results in spontaneous tumor  
487 regression and improved survival of tumor-bearing mice through an “antitumor” TME.

488 Autophagy plays a key role in the function and development of neutrophils,  
489 macrophages, NK cells, T cells and B cells and dendritic cells [62], key components of  
490 TME. In general, the relationship between autophagy and immune system is complex,  
491 and there is no consensus on the role autophagy plays in antitumor immunity. Our data  
492 suggest at least two of these populations, T lymphocytes and macrophages, are  
493 affected by attenuated host autophagy within TME. The improved antitumor TME in  
494 *Atg5<sup>flox/flox</sup>* mice is consistent with reports from recent studies that implicate autophagy  
495 in immune evasion which may restrain antitumor immunity [63, 64]. For example,  
496 Cunha et al. reported that the growth of subcutaneously engrafted murine melanoma  
497 is suppressed in ATG5-compromised mice by M1-polarized TAMs and increased type  
498 I IFN production [65]. Further, autophagy promotes tumor immune tolerance by  
499 enabling Treg function and limiting expression of IFN and CD8<sup>+</sup> T cell response which  
500 in turn enables tumor growth [66]. Likewise, blocking hypoxia-induced autophagy in  
501 tumors restores cytotoxic T cell activity and promotes regression in lung cancer [36].  
502 Additionally, loss of host autophagy increases the level of circulating pro-inflammatory  
503 cytokines and promotes T cell infiltration in tumors with high tumor mutational burden  
504 [66]. Consistent with these reports, we showed that autophagy is a critical immune-  
505 suppressing factor that regulates the infiltration and activity of cytotoxic CD8<sup>+</sup> T cells.  
506 We found that attenuation, even not complete depletion, of ATG5 abundance alone is  
507 sufficient to increase IFN- $\gamma$  expression by IFN- $\gamma$  producing cells at both early and later  
508 tumor stages in *Atg5<sup>flox/flox</sup>* mice. Tumor-infiltrating CD8<sup>+</sup> T cells is a useful prognostic  
509 parameter in various cancers [67]. Indeed, CD8<sup>+</sup> T cells are restrained due to long-  
510 lasting interactions with TAMs, whereas depletion of TAMs restores T cell migration  
511 and infiltration into tumor islets [68]. Consistently, we found that there are more

512 macrophages infiltrating the tumors in *Atg5<sup>+/+</sup>* mice, which may impede migration of  
513 CD8<sup>+</sup> T cells into the TME.

514 Herein, we also report glutamine to be an immunometabolic regulator in SMGs that  
515 links compromised autophagy to immunosuppressive Foxp3<sup>+</sup> Tregs. Tregs play a  
516 crucial role in the prevention of antitumor immunity by suppressing the activation and  
517 differentiation of CD4<sup>+</sup> helper T cells and CD8<sup>+</sup> cytotoxic T lymphocytes [69]. In this  
518 study, we found that increased Tregs infiltrate was accompanied with low CD8<sup>+</sup>IFN- $\gamma$ <sup>+</sup>  
519 infiltrate in SMGs and spleens in tumor-bearing *Atg5<sup>+/+</sup>* mice at Day 25. Higher Treg  
520 infiltrate within SMG TME of tumor-bearing *Atg5<sup>+/+</sup>* mice would inhibit CD8<sup>+</sup> cytotoxic T  
521 cells, leading to a tumor progression phenotype. Moreover, we found that glutamine  
522 supplementation inhibited the skewing of naïve T cells isolated from the spleen into  
523 Tregs. In concordance with our previous studies [40], the difference in Intratumoral  
524 glutamine level was prominent between SMGs of *Atg5<sup>+/+</sup>* and *Atg5<sup>flox/flox</sup>* recipient mice  
525 (**Fig. 5C**). Glutamine is a non-essential, but the most abundant amino acid in the body  
526 [70]. It participates in central metabolic processes by acting as an energy substrate for  
527 the tricarboxylic acid cycle and a nitrogen donor in several pathways including  
528 purine/pyrimidine synthesis, nicotinamide adenine dinucleotide metabolism, and the  
529 urea cycle [71, 72]. Several mechanisms have been suggested to link glutamine and  
530 antitumor immunity. In macrophages and T cells, it has been reported to be mediated  
531 via shifts in energy utilization (*i.e.*, the balance between glycolysis and glutaminolysis),  
532 which alters the levels of intermediary metabolites such as  $\alpha$ KG [73]. A report by Tran  
533 et al. showed that glutamine- $\alpha$ KG axis suppresses Wnt signaling and promotes cellular  
534 differentiation, thereby restricting tumor growth in colorectal cancer [74]. Furthermore,  
535  $\alpha$ KG-dependent demethylation is a critical regulatory step in T cell activation and  
536 differentiation and macrophage polarization [75-77]. Herein, we demonstrate that high  
537 glutamine levels reduced CD4<sup>+</sup>CD25<sup>+</sup>Foxp3<sup>+</sup> Treg cell population (**Fig. 5E, F**). Here,  
538 we established a causal link between dietary glutamine supplementation and antitumor  
539 immunity in mouse MST was established.

540 Nutritional stress is used by cancer cells to generate an immunosuppressive  
541 microenvironment to impact the function of tumor-infiltrating lymphocytes [13, 78-80].  
542 Within tumors, intratumor nutrient level is determined by the net balance of host blood  
543 supply, autophagy, and the net competition between tumor cells and other TME  
544 residents [78]. In addition, the increased metabolic demands of tumor cells and  
545 activated T lymphocytes may introduce competition for glutamine within the TME [81],  
546 creating a scenario in which tumor cells out-compete T cells for local glutamine and  
547 thereby alter the characteristics of the tumor-infiltrating lymphocytes. Thus, in this



548 scenario the glutamine consumption would both promote proliferation and survival of  
549 tumor cells and limit the capacity for T cell-mediated antitumor immunity  
550 simultaneously, similar to observations with arginine [78]. Accordingly, we postulated  
551 that glutamine-consuming tumors, such as MSTs, might benefit therapeutically from  
552 dietary glutamine supplementation, improving antitumor T cell responses by reversing  
553 a tumor “glutamine grab” phenomenon. However, other immune cells may also be  
554 affected by dietary glutamine supplementation. For example, the production of  $\alpha$ KG  
555 via glutaminolysis is important for activation of M2-like macrophages [77]. Thus,  
556 although our findings of improved intratumoral T cell effector functions likely result from  
557 the increased glutamine availability to suppress Tregs, the potential remains for  
558 additional factors that can impact the immune system such as inhibition of suppressive  
559 microenvironments by M2-like macrophages. It is also possible that different residents  
560 within TME use distinct nutrients according to their own unique metabolic programs.  
561 The dietary glutamine supplementation enables a metabolic signaling pathway that  
562 suppress the function of some immune system T cells to promote others. The concept  
563 of preventing the “glutamine steal” by tumor cells as a treatment strategy may be  
564 applicable beyond MSTs as multiple types of tumors are also considered to be  
565 glutamine-addicted. It is possible that this phenomenon is playing out in other cancers  
566 as well.  
567

568 **Conclusions**

569 In summary, we found an elevated expression of basal proinflammatory cytokines  
570 in the SMGs of naïve *Atg5<sup>flox/flox</sup>* mice with attenuated autophagy. Subsequently, we  
571 developed a syngeneic orthotopic MST tumor model in *Atg5<sup>+/+</sup>* and *Atg5<sup>flox/flox</sup>* mice and  
572 revealed that *Atg5<sup>flox/flox</sup>* mice suppressed orthotopically allografted MST cells.  
573 Together with reduced growth of tumors, there was an enhanced antitumor immune  
574 response demonstrated by reduction of both M1 and M2 macrophages, increased  
575 infiltration of CD8<sup>+</sup> T cells, elevated IFN- $\gamma$  production, as well as decreased inhibitory  
576 Tregs within TME and spleens of recipient mice. Mechanistically, attenuated  
577 autophagy led to increased levels of glutamine within SMGs which in turn would  
578 promote the inflammatory T cells while inhibiting the generation of Tregs in tumor-  
579 bearing *Atg5<sup>flox/flox</sup>* mice. In addition, dietary glutamine supplementation, mimicking  
580 attenuated autophagy, retarded tumor expansion in *Atg5<sup>+/+</sup>* mice.

581

582 **Abbreviations**

583  $\alpha$ KG:  $\alpha$ -ketoglutarate; ATG3: autophagy-related 3; ATG5: autophagy-related 5; ATG7:  
584 autophagy-related 7; ATG12: autophagy-related 12; CD25: cluster of differentiation 25;  
585 CD28: cluster of differentiation 28; CD3: cluster of differentiation 3; CD4: cluster of  
586 differentiation 4; CD8: cluster of differentiation 8; FOXP3: forkhead box P3; IFN- $\gamma$ :  
587 interferon gamma; IL1: interleukin-1; IL2: interleukin-2; IL6: interleukin-6; Treg:  
588 regulatory T cell; KRAS: kirsten rat sarcoma viral oncogene homolog; LPS:  
589 lipopolysaccharide; MST: malignant salivary gland tumor; NK: natural killer cell; P21:  
590 cyclin dependent kinase inhibitor 1A; SDC: salivary duct carcinoma; SMG:  
591 submandibular gland; TAM: tumor-associated macrophage; TGFB: transforming  
592 growth factor beta; Th1: type 1 T helper cell; Th2: type 2 T helper cell; TME: tumor  
593 microenvironment; TNFA: tumor necrosis factor alpha; Treg: regulatory T cell.

594

595 **Acknowledgements**

596 We thank members of Dr. Ann's laboratory for helpful discussions on the manuscript.

597 This work was supported in part by funds from the National Institutes of Health

598 R01DE10742, R21DE023298 and R01DE026304 (to D.K.A.), and P30CA033572

599 (supporting research work carried out in Core Facilities).

600 **Author Contributions**

601 S.C., Y.C., Y.-C.W., Y.-W.H., Y.Q., X.Z., H.H.L., and D.K.A. designed the experiments  
602 and analyzed the data. S.C., Y.C., Y.-C.W., Y.-W.H., Y.Q., W.H., and A.C. executed  
603 experiments. C.O. analyzed public datasets. S.C., H.H.L., Z.S., E.M. and D.K.A.  
604 prepared the manuscript. All authors have commented on the manuscript.

605 **Competing Financial Interests**

606 The authors declare no competing financial interests.

607

608 **References**

- 609 1. Gonzalez H, Hagerling C, Werb Z. Roles of the immune system in cancer: from  
610 tumor initiation to metastatic progression. *Genes Dev.* 2018; 32: 1267-84.
- 611 2. Nguyen KB, Spranger S. Modulation of the immune microenvironment by tumor-  
612 intrinsic oncogenic signaling. *J Cell Biol.* 2020; 219.
- 613 3. Zou W. Immunosuppressive networks in the tumour environment and their  
614 therapeutic relevance. *Nat Rev Cancer.* 2005; 5: 263-74.
- 615 4. Young A, Okuyemi OT. Malignant Salivary Gland Tumors [Updated 2022 Feb 16].  
616 StatPearls. Treasure Island (FL): StatPearls Publishing; 2022 Jan.
- 617 5. Linxweiler M, Kuo F, Katabi N, Lee M, Nadeem Z, Dalin MG, et al. The Immune  
618 Microenvironment and Neoantigen Landscape of Aggressive Salivary Gland  
619 Carcinomas Differ by Subtype. *Clinical Cancer Research.* 2020; 26: 2859.
- 620 6. Dalin MG, Desrichard A, Katabi N, Makarov V, Walsh LA, Lee KW, et al.  
621 Comprehensive Molecular Characterization of Salivary Duct Carcinoma Reveals  
622 Actionable Targets and Similarity to Apocrine Breast Cancer. *Clin Cancer Res.*  
623 2016; 22: 4623-33.
- 624 7. Dalin MG, Katabi N, Persson M, Lee KW, Makarov V, Desrichard A, et al. Multi-  
625 dimensional genomic analysis of myoepithelial carcinoma identifies prevalent  
626 oncogenic gene fusions. *Nat Commun.* 2017; 8: 1197.
- 627 8. Ho AS, Ochoa A, Jayakumaran G, Zehir A, Valero Mayor C, Tepe J, et al. Genetic  
628 hallmarks of recurrent/metastatic adenoid cystic carcinoma. *J Clin Invest.* 2019;  
629 129: 4276-89.
- 630 9. Linxweiler M, Kuo F, Katabi N, Lee M, Nadeem Z, Dalin MG, et al. The Immune  
631 Microenvironment and Neoantigen Landscape of Aggressive Salivary Gland  
632 Carcinomas Differ by Subtype. *Clin Cancer Res.* 2020; 26: 2859-70.
- 633 10. Xu B, Jungbluth AA, Frosina D, Alzumaili B, Aleynick N, Slodkowska E, et al. The  
634 immune microenvironment and expression of PD-L1, PD-1, PRAME and MHC I  
635 in salivary duct carcinoma. *Histopathology.* 2019; 75: 672-82.
- 636 11. MacIver NJ, Michalek RD, Rathmell JC. Metabolic regulation of T lymphocytes.  
637 *Annu Rev Immunol.* 2013; 31: 259-83.
- 638 12. Shyer JA, Flavell RA, Bailis W. Metabolic signaling in T cells. *Cell Res.* 2020; 30:  
639 649-59.
- 640 13. Wang W, Zou W. Amino Acids and Their Transporters in T Cell Immunity and  
641 Cancer Therapy. *Mol Cell.* 2020; 80: 384-95.
- 642 14. Farhood B, Najafi M, Mortezaee K. CD8(+) cytotoxic T lymphocytes in cancer  
643 immunotherapy: A review. *J Cell Physiol.* 2019; 234: 8509-21.
- 644 15. Hadrup S, Donia M, Thor Straten P. Effector CD4 and CD8 T cells and their role  
645 in the tumor microenvironment. *Cancer Microenviron.* 2013; 6: 123-33.
- 646 16. Olenchock BA, Rathmell JC, Vander Heiden MG. Biochemical Underpinnings of  
647 Immune Cell Metabolic Phenotypes. *Immunity.* 2017; 46: 703-13.
- 648 17. Cluxton D, Petrasca A, Moran B, Fletcher JM. Differential Regulation of Human  
649 Treg and Th17 Cells by Fatty Acid Synthesis and Glycolysis. *Front Immunol.* 2019;  
650 10: 115.

- 651 18. Nishikawa H, Sakaguchi S. Regulatory T cells in tumor immunity. *Int J Cancer*.  
652 2010; 127: 759-67.
- 653 19. Lahiri V, Hawkins WD, Klionsky DJ. Watch What You (Self-) Eat: Autophagic  
654 Mechanisms that Modulate Metabolism. *Cell Metab*. 2019; 29: 803-26.
- 655 20. Poillet-Perez L, Xie X, Zhan L, Yang Y, Sharp DW, Hu ZS, et al. Autophagy  
656 maintains tumour growth through circulating arginine. *Nature*. 2018; 563: 569-73.
- 657 21. Mgrditchian T, Arakelian T, Paggetti J, Noman MZ, Viry E, Moussay E, et al.  
658 Targeting autophagy inhibits melanoma growth by enhancing NK cells infiltration  
659 in a CCL5-dependent manner. *Proc Natl Acad Sci U S A*. 2017; 114: E9271-E9.
- 660 22. Michaud M, Martins I, Sukkurwala AQ, Adjemian S, Ma Y, Pellegatti P, et al.  
661 Autophagy-dependent anticancer immune responses induced by  
662 chemotherapeutic agents in mice. *Science*. 2011; 334: 1573-7.
- 663 23. Folkerts H, Hilgendorf S, Vellenga E, Bremer E, Wiersma VR. The multifaceted  
664 role of autophagy in cancer and the microenvironment. *Med Res Rev*. 2019; 39:  
665 517-60.
- 666 24. Monkkonen T, Debnath J. Inflammatory signaling cascades and autophagy in  
667 cancer. *Autophagy*. 2018; 14: 190-8.
- 668 25. Levy JMM, Towers CG, Thorburn A. Targeting autophagy in cancer. *Nat Rev*  
669 *Cancer*. 2017; 17: 528-42.
- 670 26. Xie Z, Klionsky DJ. Autophagosome formation: core machinery and adaptations.  
671 *Nature Cell Biology*. 2007; 9: 1102-9.
- 672 27. Uhlen M, Zhang C, Lee S, Sjöstedt E, Fagerberg L, Bidkhori G, et al. A pathology  
673 atlas of the human cancer transcriptome. *Science*. 2017; 357: eaan2507.
- 674 28. Jia W, He MX, McLeod IX, Guo J, Ji D, He YW. Autophagy regulates T lymphocyte  
675 proliferation through selective degradation of the cell-cycle inhibitor  
676 CDKN1B/p27Kip1. *Autophagy*. 2015; 11: 2335-45.
- 677 29. Valdor R, Macian F. Autophagy and the regulation of the immune response.  
678 *Pharmacol Res*. 2012; 66: 475-83.
- 679 30. Pearce EL. Metabolism in T cell activation and differentiation. *Curr Opin Immunol*.  
680 2010; 22: 314-20.
- 681 31. Hubbard VM, Valdor R, Patel B, Singh R, Cuervo AM, Macian F. Macroautophagy  
682 regulates energy metabolism during effector T cell activation. *J Immunol*. 2010;  
683 185: 7349-57.
- 684 32. Jia W, He YW. Temporal regulation of intracellular organelle homeostasis in T  
685 lymphocytes by autophagy. *J Immunol*. 2011; 186: 5313-22.
- 686 33. Pua HH, Dzhagalov I, Chuck M, Mizushima N, He YW. A critical role for the  
687 autophagy gene Atg5 in T cell survival and proliferation. *J Exp Med*. 2007; 204:  
688 25-31.
- 689 34. Wei J, Long L, Yang K, Guy C, Shrestha S, Chen Z, et al. Autophagy enforces  
690 functional integrity of regulatory T cells by coupling environmental cues and  
691 metabolic homeostasis. *Nat Immunol*. 2016; 17: 277-85.
- 692 35. Michalek RD, Gerriets VA, Jacobs SR, Macintyre AN, MacIver NJ, Mason EF, et  
693 al. Cutting edge: distinct glycolytic and lipid oxidative metabolic programs are



- 694 essential for effector and regulatory CD4+ T cell subsets. *J Immunol.* 2011; 186:  
695 3299-303.
- 696 36. Noman MZ, Janji B, Kaminska B, Van Moer K, Pierson S, Przanowski P, et al.  
697 Blocking hypoxia-induced autophagy in tumors restores cytotoxic T-cell activity  
698 and promotes regression. *Cancer Res.* 2011; 71: 5976-86.
- 699 37. Peng W, Chen JQ, Liu C, Malu S, Creasy C, Tetzlaff MT, et al. Loss of PTEN  
700 Promotes Resistance to T Cell-Mediated Immunotherapy. *Cancer Discov.* 2016;  
701 6: 202-16.
- 702 38. Amaravadi RK. *Cancer. Autophagy in tumor immunity.* *Science.* 2011; 334: 1501-  
703 2.
- 704 39. de Souza ASC, Gonçalves LB, Lepique AP, de Araujo-Souza PS. The Role of  
705 Autophagy in Tumor Immunology—Complex Mechanisms That May Be Explored  
706 Therapeutically. *Frontiers in Oncology.* 2020; 10.
- 707 40. Lin HH, Chung Y, Cheng CT, Ouyang C, Fu Y, Kuo CY, et al. Autophagic reliance  
708 promotes metabolic reprogramming in oncogenic KRAS-driven tumorigenesis.  
709 *Autophagy.* 2018; 14: 1481-98.
- 710 41. Fu Y, Cruz-Monserrate Z, Helen Lin H, Chung Y, Ji B, Lin SM, et al. Ductal  
711 activation of oncogenic KRAS alone induces sarcomatoid phenotype. *Sci Rep.*  
712 2015; 5: 13347.
- 713 42. Lin HH, Lin SM, Chung Y, Vonderfecht S, Camden JM, Flodby P, et al. Dynamic  
714 involvement of ATG5 in cellular stress responses. *Cell Death Dis.* 2014; 5: e1478.
- 715 43. Ishak Gabra MB, Yang Y, Li H, Senapati P, Hanse EA, Lowman XH, et al. Dietary  
716 glutamine supplementation suppresses epigenetically-activated oncogenic  
717 pathways to inhibit melanoma tumour growth. *Nat Commun.* 2020; 11: 3326.
- 718 44. Cao S, Wu H, Wang C, Zhang Q, Jiao L, Lin F, et al. Diquat-induced oxidative  
719 stress increases intestinal permeability, impairs mitochondrial function, and  
720 triggers mitophagy in piglets. *J Anim Sci.* 2018; 96: 1795-805.
- 721 45. Pan M, Reid MA, Lowman XH, Kulkarni RP, Tran TQ, Liu X, et al. Regional  
722 glutamine deficiency in tumours promotes dedifferentiation through inhibition of  
723 histone demethylation. *Nat Cell Biol.* 2016; 18: 1090-101.
- 724 46. Aguilar JA, Nilsson M, Bodenhausen G, Morris GA. Spin echo NMR spectra  
725 without J modulation. *Chem Commun (Camb).* 2012; 48: 811-3.
- 726 47. Jounai N, Takeshita F, Kobiyama K, Sawano A, Miyawaki A, Xin KQ, et al. The  
727 Atg5 Atg12 conjugate associates with innate antiviral immune responses. *Proc*  
728 *Natl Acad Sci U S A.* 2007; 104: 14050-5.
- 729 48. Levine B, Mizushima N, Virgin HW. Autophagy in immunity and inflammation.  
730 *Nature.* 2011; 469: 323-35.
- 731 49. Zhou J, Tang Z, Gao S, Li C, Feng Y, Zhou X. Tumor-Associated Macrophages:  
732 Recent Insights and Therapies. *Front Oncol.* 2020; 10: 188.
- 733 50. Lin Y, Xu J, Lan H. Tumor-associated macrophages in tumor metastasis:  
734 biological roles and clinical therapeutic applications. *J Hematol Oncol.* 2019; 12:  
735 76.

- 736 51. Mulder R, Banete A, Basta S. Spleen-derived macrophages are readily polarized  
737 into classically activated (M1) or alternatively activated (M2) states.  
738 *Immunobiology*. 2014; 219: 737-45.
- 739 52. Beheshti A, Wage J, McDonald JT, Lamont C, Peluso M, Hahnfeldt P, et al.  
740 Tumor-host signaling interaction reveals a systemic, age-dependent splenic  
741 immune influence on tumor development. *Oncotarget*. 2015; 6: 35419-32.
- 742 53. Castro F, Cardoso AP, Gonçalves RM, Serre K, Oliveira MJ. Interferon-Gamma  
743 at the Crossroads of Tumor Immune Surveillance or Evasion. *Front Immunol*.  
744 2018; 9: 847.
- 745 54. Prussin C, Metcalfe DD. Detection of intracytoplasmic cytokine using flow  
746 cytometry and directly conjugated anti-cytokine antibodies. *J Immunol Methods*.  
747 1995; 188: 117-28.
- 748 55. Chraa D, Naim A, Olive D, Badou A. T lymphocyte subsets in cancer immunity:  
749 Friends or foes. *J Leukoc Biol*. 2019; 105: 243-55.
- 750 56. Carr EL, Kelman A, Wu GS, Gopaul R, Senkevitch E, Aghvanyan A, et al.  
751 Glutamine uptake and metabolism are coordinately regulated by ERK/MAPK  
752 during T lymphocyte activation. *Journal of immunology (Baltimore, Md : 1950)*.  
753 2010; 185: 1037-44.
- 754 57. Seo JW, Choi J, Lee SY, Sung S, Yoo HJ, Kang MJ, et al. Autophagy is required  
755 for PDAC glutamine metabolism. *Sci Rep*. 2016; 6: 37594.
- 756 58. Hanahan D, Weinberg RA. Hallmarks of cancer: the next generation. *Cell*. 2011;  
757 144: 646-74.
- 758 59. Li ZL, Zhang HL, Huang Y, Huang JH, Sun P, Zhou NN, et al. Autophagy  
759 deficiency promotes triple-negative breast cancer resistance to T cell-mediated  
760 cytotoxicity by blocking tenascin-C degradation. *Nat Commun*. 2020; 11: 3806.
- 761 60. Rao S, Tortola L, Perlot T, Wirnsberger G, Novatchkova M, Nitsch R, et al. A dual  
762 role for autophagy in a murine model of lung cancer. *Nat Commun*. 2014; 5: 3056.
- 763 61. Matsuzawa-Ishimoto Y, Hwang S, Cadwell K. Autophagy and Inflammation.  
764 *Annual Review of Immunology*. 2018; 36: 73-101.
- 765 62. Anderson NM, Simon MC. The tumor microenvironment. *Current Biology*. 2020;  
766 30: R921-R5.
- 767 63. Bian Y, Li W, Kremer DM, Sajjakulnukit P, Li S, Crespo J, et al. Cancer SLC43A2  
768 alters T cell methionine metabolism and histone methylation. *Nature*. 2020; 585:  
769 277-82.
- 770 64. DeVorkin L, Pavey N, Carleton G, Comber A, Ho C, Lim J, et al. Autophagy  
771 Regulation of Metabolism Is Required for CD8(+) T Cell Anti-tumor Immunity. *Cell*  
772 *Rep*. 2019; 27: 502-13 e5.
- 773 65. Cunha LD, Yang M, Carter R, Guy C, Harris L, Crawford JC, et al. LC3-Associated  
774 Phagocytosis in Myeloid Cells Promotes Tumor Immune Tolerance. *Cell*. 2018;  
775 175: 429-41 e16.
- 776 66. Poillet-Perez L, Sharp DW, Yang Y, Laddha SV, Ibrahim M, Bommareddy PK, et  
777 al. Autophagy promotes growth of tumors with high mutational burden by inhibiting  
778 a T-cell immune response. *Nature Cancer*. 2020; 1: 923-34.

- 779 67. Blessin NC, Li W, Mandelkow T, Jansen HL, Yang C, Raedler JB, et al. Prognostic  
780 role of proliferating CD8(+) cytotoxic T cells in human cancers. *Cell Oncol (Dordr)*.  
781 2021; 44: 793-803.
- 782 68. Peranzoni E, Lemoine J, Vimeux L, Feuillet V, Barrin S, Kantari-Mimoun C, et al.  
783 Macrophages impede CD8 T cells from reaching tumor cells and limit the efficacy  
784 of anti-PD-1 treatment. *Proc Natl Acad Sci U S A*. 2018; 115: E4041-E50.
- 785 69. Vignali DAA, Collison LW, Workman CJ. How regulatory T cells work. *Nature*  
786 *Reviews Immunology*. 2008; 8: 523-32.
- 787 70. Watford M. Glutamine and glutamate: Nonessential or essential amino acids?  
788 *Anim Nutr*. 2015; 1: 119-22.
- 789 71. Zhang J, Pavlova NN, Thompson CB. Cancer cell metabolism: the essential role  
790 of the nonessential amino acid, glutamine. *EMBO J*. 2017; 36: 1302-15.
- 791 72. Buck MD, O'Sullivan D, Pearce EL. T cell metabolism drives immunity. *J Exp Med*.  
792 2015; 212: 1345-60.
- 793 73. Wise DR, Thompson CB. Glutamine addiction: a new therapeutic target in cancer.  
794 *Trends Biochem Sci*. 2010; 35: 427-33.
- 795 74. Tran TQ, Hanse EA, Habowski AN, Li H, Gabra MBI, Yang Y, et al.  $\alpha$ -  
796 Ketoglutarate attenuates Wnt signaling and drives differentiation in colorectal  
797 cancer. *Nat Cancer*. 2020; 1: 345-58.
- 798 75. Johnson MO, Wolf MM, Madden MZ, Andrejeva G, Sugiura A, Contreras DC, et al.  
799 Distinct Regulation of Th17 and Th1 Cell Differentiation by Glutaminase-  
800 Dependent Metabolism. *Cell*. 2018; 175: 1780-95 e19.
- 801 76. Klysz D, Tai X, Robert PA, Craveiro M, Cretenet G, Oburoglu L, et al. Glutamine-  
802 dependent  $\alpha$ -ketoglutarate production regulates the balance between T helper 1  
803 cell and regulatory T cell generation. *Sci Signal*. 2015; 8: ra97.
- 804 77. Liu PS, Wang H, Li X, Chao T, Teav T, Christen S, et al.  $\alpha$ -ketoglutarate  
805 orchestrates macrophage activation through metabolic and epigenetic  
806 reprogramming. *Nat Immunol*. 2017; 18: 985-94.
- 807 78. Geiger R, Rieckmann JC, Wolf T, Basso C, Feng Y, Fuhrer T, et al. L-Arginine  
808 Modulates T Cell Metabolism and Enhances Survival and Anti-tumor Activity. *Cell*.  
809 2016; 167: 829-42 e13.
- 810 79. Timosenko E, Ghadbane H, Silk JD, Shepherd D, Gileadi U, Howson LJ, et al.  
811 Nutritional Stress Induced by Tryptophan-Degrading Enzymes Results in ATF4-  
812 Dependent Reprogramming of the Amino Acid Transporter Profile in Tumor Cells.  
813 *Cancer Res*. 2016; 76: 6193-204.
- 814 80. Edwards DN, Ngwa VM, Raybuck AL, Wang S, Hwang Y, Kim LC, et al. Selective  
815 glutamine metabolism inhibition in tumor cells improves antitumor T lymphocyte  
816 activity in triple-negative breast cancer. *The Journal of Clinical Investigation*.  
817 2021; 131.
- 818 81. Cluntun AA, Lukey MJ, Cerione RA, Locasale JW. Glutamine Metabolism in  
819 Cancer: Understanding the Heterogeneity. *Trends Cancer*. 2017; 3: 169-80.

820

821 **Table 1.** Immune cell profile in autophagy-deficient versus autophagy-sufficient tumor  
822 microenvironments at two selected endpoints, Day 14 and Day 25, post-tumor  
823 implantation. Data summarized is based on flow cytometry analyses from **Figs. 2-5**  
824 and **S2**.

| Host genotypes                              | <i>Atg5<sup>flox/flox</sup></i> versus <i>Atg5<sup>+/+</sup></i> |        |
|---------------------------------------------|------------------------------------------------------------------|--------|
|                                             | Day 14                                                           | Day 25 |
| NK cells                                    | –                                                                | –      |
| Neutrophils                                 | –                                                                | –      |
| CD4 <sup>+</sup> T cells                    | –                                                                | –      |
| CD8 <sup>+</sup> T cells                    | ↑                                                                | ↑      |
| CD4 <sup>+</sup> IFN- $\gamma$ <sup>+</sup> | –                                                                | ↑      |
| CD8 <sup>+</sup> IFN- $\gamma$ <sup>+</sup> | –                                                                | ↑      |
| TAMs (M1 and M2)                            | –                                                                | ↓      |
| Tregs                                       | ↓                                                                | ↓      |

825

826

827 **Figure Legends**

828 **Fig. 1. Attenuated autophagy is essential for the suppression of malignant**  
829 **salivary tumors.**

830 (A) Autophagy activity was verified in SMGs and spleens from *Atg5<sup>flox/flox</sup>* mice by  
831 determining the expression of ATG5 and decreased ratio of LC3-II/I. A representative  
832 Western blot analysis of ATG5 and basal LC3 in SMGs and spleens from *Atg5<sup>+/+</sup>* and  
833 *Atg5<sup>flox/flox</sup>* mice following salivary tumor cell inoculation. (B) Quantitative RT-PCR  
834 analyses show basal expression of selected proinflammatory cytokine genes in SMGs  
835 from naïve *Atg5<sup>+/+</sup>* (n = 3) and *Atg5<sup>flox/flox</sup>* (n = 5) mice. (C) Schematic diagram of  
836 orthotopic allograft of salivary tumor cells in right SMGs. Host genotypes are  
837 designated as *Atg5<sup>+/+</sup>* and *Atg5<sup>flox/flox</sup>*, while the injected tumor cell genotypes are  
838 designated as *KRAS<sup>G12V</sup>;Atg5<sup>+/+</sup>* and *KRAS<sup>G12V</sup>;Atg5<sup>ΔΔ</sup>*. (D, E, F) Compromised host  
839 autophagy reduces orthotopically implanted salivary tumor expansion. (D) Tumor  
840 volumes were recorded at 2-day intervals. A representative tumor growth curve is  
841 shown. The limitation in tumor growth in host recipients with ATG5 deficiency was  
842 observed starting from Day 16 following salivary tumor cell inoculation. (E, F) Tumor-  
843 bearing SMG weights were measured, and images were taken at Day 25 post-tumor  
844 cell inoculation or at humane endpoints. *Atg5<sup>+/+</sup>* and *Atg5<sup>flox/flox</sup>* mice were injected with  
845  $2 \times 10^5$  primary tumor cells (*KRAS<sup>G12V</sup>;Atg5<sup>+/+</sup>* and *KRAS<sup>G12V</sup>;Atg5<sup>ΔΔ</sup>*) in right  
846 submandibular glands of *Atg5<sup>+/+</sup>* (n = 18) and *Atg5<sup>flox/flox</sup>* (n = 15) mice (E).  
847 Representative images of salivary tumors harvested from of *Atg5<sup>+/+</sup>* and *Atg5<sup>flox/flox</sup>* mice  
848 (F). (G) Hematoxylin and eosin (H&E) staining and Ki-67 immunohistochemical  
849 staining of SMG tumors. At Day 14 and Day 25 post-implantation, SMGs tissue  
850 samples from *Atg5<sup>+/+</sup>* and *Atg5<sup>flox/flox</sup>* mice were collected, processed, and stained with  
851 H&E and an anti-Ki-67 antibody for IHC. (H) Quantification of Ki-67<sup>+</sup> cells is as shown  
852 (*Atg5<sup>+/+</sup>*: n = 6; *Atg5<sup>flox/flox</sup>*: n = 4). Five random low-power fields were quantified from  
853 each mouse. Scale bar, 250 μm and 50 μm (enlarged view); respectively. Data are  
854 shown as mean ± SD; \*:  $p < 0.05$ ; \*\*:  $p < 0.01$ ; \*\*\*\*:  $p < 0.0001$ ; Student's *t*-test, 2-  
855 tailed, unpaired.

856 **Fig. 2. A decrease in M1 and M2 macrophages within TME in tumor-bearing**  
857 ***Atg5<sup>flox/flox</sup>* mice.**

858 (A) Representative immunohistochemical staining of pan-macrophage marker F4/80  
859 were performed on Day 14 (upper left two panels) and Day 25 (lower left two panels)  
860 in SMG tumors from *Atg5<sup>+/+</sup>* and *Atg5<sup>flox/flox</sup>* mice. Scale bar, 250 μm and 50 μm  
861 (enlarged view); respectively. Quantification of F4/80 in Day 14 (upper right panel) and  
862 Day 25 (lower right panel) SMG tumors is as shown. Five random low-power fields

863 were quantified from each mouse. (Day 14,  $Atg5^{+/+}$ : n=4 and  $Atg5^{flox/flox}$ : n = 4; Day 25,  
864  $Atg5^{+/+}$ : n = 6 and  $Atg5^{flox/flox}$ : n = 3.) (B, C) Flow cytometry analyses show the  
865 percentage of M1 macrophages (CD11b<sup>+</sup>F4/80<sup>+</sup>MHCII<sup>+</sup>CD86<sup>+</sup>, *left panel*), M2  
866 macrophages (CD11b<sup>+</sup>F4/80<sup>+</sup>MHCII<sup>-</sup>CD206<sup>+</sup>, *middle panel*) and macrophages  
867 (CD11b<sup>+</sup>F4/80<sup>+</sup>, *right panel*) in alive SMG cells (B) and splenocytes (C) of tumor-  
868 bearing mice at Day 14 post-implantation. (D, E) Flow cytometry analyses show the  
869 percentage of M1 macrophages (CD11b<sup>+</sup>F4/80<sup>+</sup>MHCII<sup>+</sup>CD86<sup>+</sup>, *left panel*), M2  
870 macrophages (CD11b<sup>+</sup>F4/80<sup>+</sup>MHCII<sup>-</sup>CD206<sup>+</sup>, *middle panel*) and macrophages  
871 (CD11b<sup>+</sup>F4/80<sup>+</sup>, *right panel*) in alive SMG cells (D) and splenocytes (E) of tumor-  
872 bearing mice at Day 25 post-inoculation.  $Atg5^{+/+}$ : n = 18 and  $Atg5^{flox/flox}$ : n = 15. Data  
873 are shown as mean ± SD; \*:  $p < 0.05$ ; \*\*:  $p < 0.01$ ; \*\*\*:  $p < 0.001$ ; Student's *t*-test, 2-  
874 tailed, unpaired.

875 **Fig. 3. An enhancement in CD8<sup>+</sup> T cells within TME in tumor-bearing  $Atg5^{flox/flox}$**   
876 **mice.**

877 (A) Representative immunohistochemistry analyses of CD8 on Day 14 SMG tumors  
878 (*upper left panels*), and CD8 (*middle left panels*) and CD4 (*lower left panels*) on Day  
879 25 SMG tumors from  $Atg5^{+/+}$  and  $Atg5^{flox/flox}$  mice. Scale bar, 250 μm and 50 μm  
880 (enlarged view); respectively. Quantification of CD8<sup>+</sup> signals in Day 14 SMG tumors  
881 (*upper right panel*) and quantification of CD8<sup>+</sup> signals (*middle right panel*) and CD4<sup>+</sup>  
882 signals (*lower right panel*) in SMG tumors from Day 25  $Atg5^{+/+}$  and  $Atg5^{flox/flox}$  mice.  
883 Five random low-power fields were quantified from each mouse.  $Atg5^{+/+}$ : n ≥ 4 and  
884  $Atg5^{flox/flox}$ : n ≥ 3. (B, C) Representative flow cytometry showing CD8<sup>+</sup> T cells and  
885 CD4<sup>+</sup>T cells isolated from alive SMG cells (B), and splenocytes (C) of tumor-bearing  
886  $Atg5^{+/+}$  and  $Atg5^{flox/flox}$  mice. (D-G) Flow cytometry analyses showing the percentage of  
887 CD8<sup>+</sup> T cells and CD4<sup>+</sup> T cells in alive SMG tumor cells, and splenocytes from Day 14  
888 (D, E) and Day 25 (F, G) tumor-bearing  $Atg5^{+/+}$  (*red*) and  $Atg5^{flox/flox}$  (*blue*) mice ( $Atg5^{+/+}$   
889 and  $Atg5^{flox/flox}$ : n ≥ 12). Data are shown as mean ± SD; \*:  $p < 0.05$ ; \*\*:  $p < 0.01$ ; \*\*\*\*:  $p$   
890 < 0.0001; Student's *t*-test, 2-tailed, unpaired.

891 **Fig. 4. Attenuated autophagy promotes IFN-γ-producing CD8<sup>+</sup> and CD4<sup>+</sup> T cells**  
892 **in SMGs and spleens of tumor-bearing mice.**

893 (A) Relative expression of proinflammatory cytokine-related genes in SMGs from  
894 tumor-bearing  $Atg5^{+/+}$  and  $Atg5^{flox/flox}$  mice, Day 14 (A) and Day 25 (B) post-  
895 implantation (n = 3). (C) Fold induction of IFN-γ-producing cells in spleens of  $Atg5^{+/+}$   
896 and  $Atg5^{flox/flox}$  mice following LPS stimulation (5 mg/kg) for 6 h compared with that  
897 from PBS control mice (n = 3). (D) The percentage of IFN-γ-producing cells in single  
898 cell suspensions of the alive SMG cells (*left panel*) and splenocytes (*right panel*), from

899 Day 14 tumor-bearing *Atg5*<sup>+/+</sup> (red) and *Atg5*<sup>flox/flox</sup> (blue) mice, following  
900 PMA/ionomycin/Golgiplug stimulation for 4 h. (E) The percentage of IFN- $\gamma$ -producing  
901 cells in single cell suspensions of the alive SMG resident cells (*left panel*) and  
902 splenocytes (*right panel*), from Day 25 tumor-bearing *Atg5*<sup>+/+</sup> (red) and *Atg5*<sup>flox/flox</sup> (blue)  
903 mice, following PMA/ionomycin/Golgiplug stimulation for 4 h. (F-I) Flow cytometry  
904 analyses showing the percentage of IFN- $\gamma$ <sup>+</sup> T cells, CD8<sup>+</sup>IFN- $\gamma$ <sup>+</sup> cells and CD4<sup>+</sup>IFN- $\gamma$ <sup>+</sup>,  
905 in single cell suspensions of the alive SMG cells and splenocytes from Day 14 (F, G)  
906 and Day 25 (H, I) tumor-bearing *Atg5*<sup>+/+</sup> (red) and *Atg5*<sup>flox/flox</sup> (blue) mice (*Atg5*<sup>+/+</sup> and  
907 *Atg5*<sup>flox/flox</sup>: n  $\geq$  5). Data are shown as mean  $\pm$  SD; \*:  $p < 0.05$ ; \*\*:  $p < 0.01$ ; \*\*\*\*:  $p <$   
908 0.0001; Student's *t*-test, 2-tailed, unpaired.

909 **Fig. 5. Attenuation of Treg population in SMGs and spleens of *Atg5*<sup>flox/flox</sup> mice is**  
910 **associated with the glutamine concentration in SMG tumor microenvironment.**

911 (A, B) Flow cytometry analyses showing CD4<sup>+</sup>CD25<sup>+</sup>Foxp3<sup>+</sup> Tregs in single cell  
912 suspensions of the SMG cells (*left panels*) and splenocytes (*right panels*) of tumor-  
913 bearing mice, Day 14 (A) and Day 25 (B) after tumor implantation (n  $\geq$  8). (C, D) Levels  
914 of glutamine (C) and  $\alpha$ -ketoglutarate ( $\alpha$ KG; D) in naïve SMGs (*left panels*) and Day 14  
915 SMG tumors (*right panels*). Glutamine and  $\alpha$ KG concentrations in SMG tumors and  
916 SMGs from naïve mice were respectively determined (n  $\geq$  5). (E) The percentage of  
917 CD4<sup>+</sup>CD25<sup>+</sup>Foxp3<sup>+</sup> Tregs, a subset of CD4<sup>+</sup> T cells, is negatively correlated with  
918 glutamine concentration in Treg polarization medium. Naïve mouse CD4<sup>+</sup> T cells were  
919 isolated from mouse spleen and cultured for 3 days in Treg polarization medium with  
920 indicated glutamine concentrations. The percentages of Foxp3<sup>+</sup> cells of total  
921 CD4<sup>+</sup>CD25<sup>+</sup> cells are indicated in the bar graph (n = 3). (F) Levels of *Foxp3* mRNA  
922 expression in the induced Tregs after cultured in Treg polarization medium with  
923 indicated glutamine concentrations for the indicated genotypes. Naïve mouse CD4<sup>+</sup> T  
924 cells were isolated from spleens of *Atg5*<sup>+/+</sup> (red) and *Atg5*<sup>flox/flox</sup> (blue) mice and cultured  
925 3 days in Treg polarization medium. Expression of *Foxp3* mRNA isolated from the  
926 differentiated cells was analyzed by qRT-PCR (n = 3). Data are presented in bar graph  
927 shown as Mean  $\pm$  SEM.  $p$  value was calculated by *t* test (unpaired, two tailed). \*:  $p <$   
928 0.05; \*\*:  $p < 0.01$ ; \*\*\*:  $p < 0.001$ ; *n.s.*, not significant.

929 **Fig. 6. Dietary glutamine supplementation reduces MST tumor burden with**  
930 **increased CD8<sup>+</sup> cell infiltration.** (A, B) 28 days of dietary glutamine supplementation  
931 increases glutamine concentration in plasma of naïve mice (A) and in SMG of tumor-  
932 bearing mice (B) (n  $\geq$  5 in each cohort). (C, D) Mice with orthotopic MST implantation  
933 were fed with control (Ctrl diet, n = 5) and glutamine-supplemented diet (Gln diet, n =

934 7), respectively, for 21 days prior to tumor implantation and for another 21 days after  
935 implantation, prior to euthanasia. Tumor volume (*left*) and wet SMG weight (*right*) at  
936 Day 21 post-tumor implantation are shown (**C**), and representative micrographs of  
937 indicated IHC stains of the orthotopic MST tumors are shown (**D**). (*Upper 4 panels*)  
938 IHC staining for CD4, CD8 and Foxp3 cells in FFPE tumor sections. Green arrows  
939 indicate Foxp3-positive (yellow nuclei staining) cells. Red arrows indicate CD8+  
940 positive (green membrane staining) cells. Inlets are a low-power overview (red boxes  
941 indicate relative spatial location of enlarged views (scale bar: 50  $\mu$ m). Peripheral (*left*)  
942 is considered < 500  $\mu$ m from the edge, central/core (non-necrotic region) > 500  $\mu$ m  
943 from the edge. (*Lower 4 panels*) IHC staining of tumor sections using PD-L1 antibody  
944 (red membrane staining). Images are representatives of  $\geq 5$  biological replicates.  
945 Nuclei were stained with hematoxylin (blue). Data are shown as mean  $\pm$  SD; \*:  $p <$   
946 0.05 by Welch  $t$  test.  
947



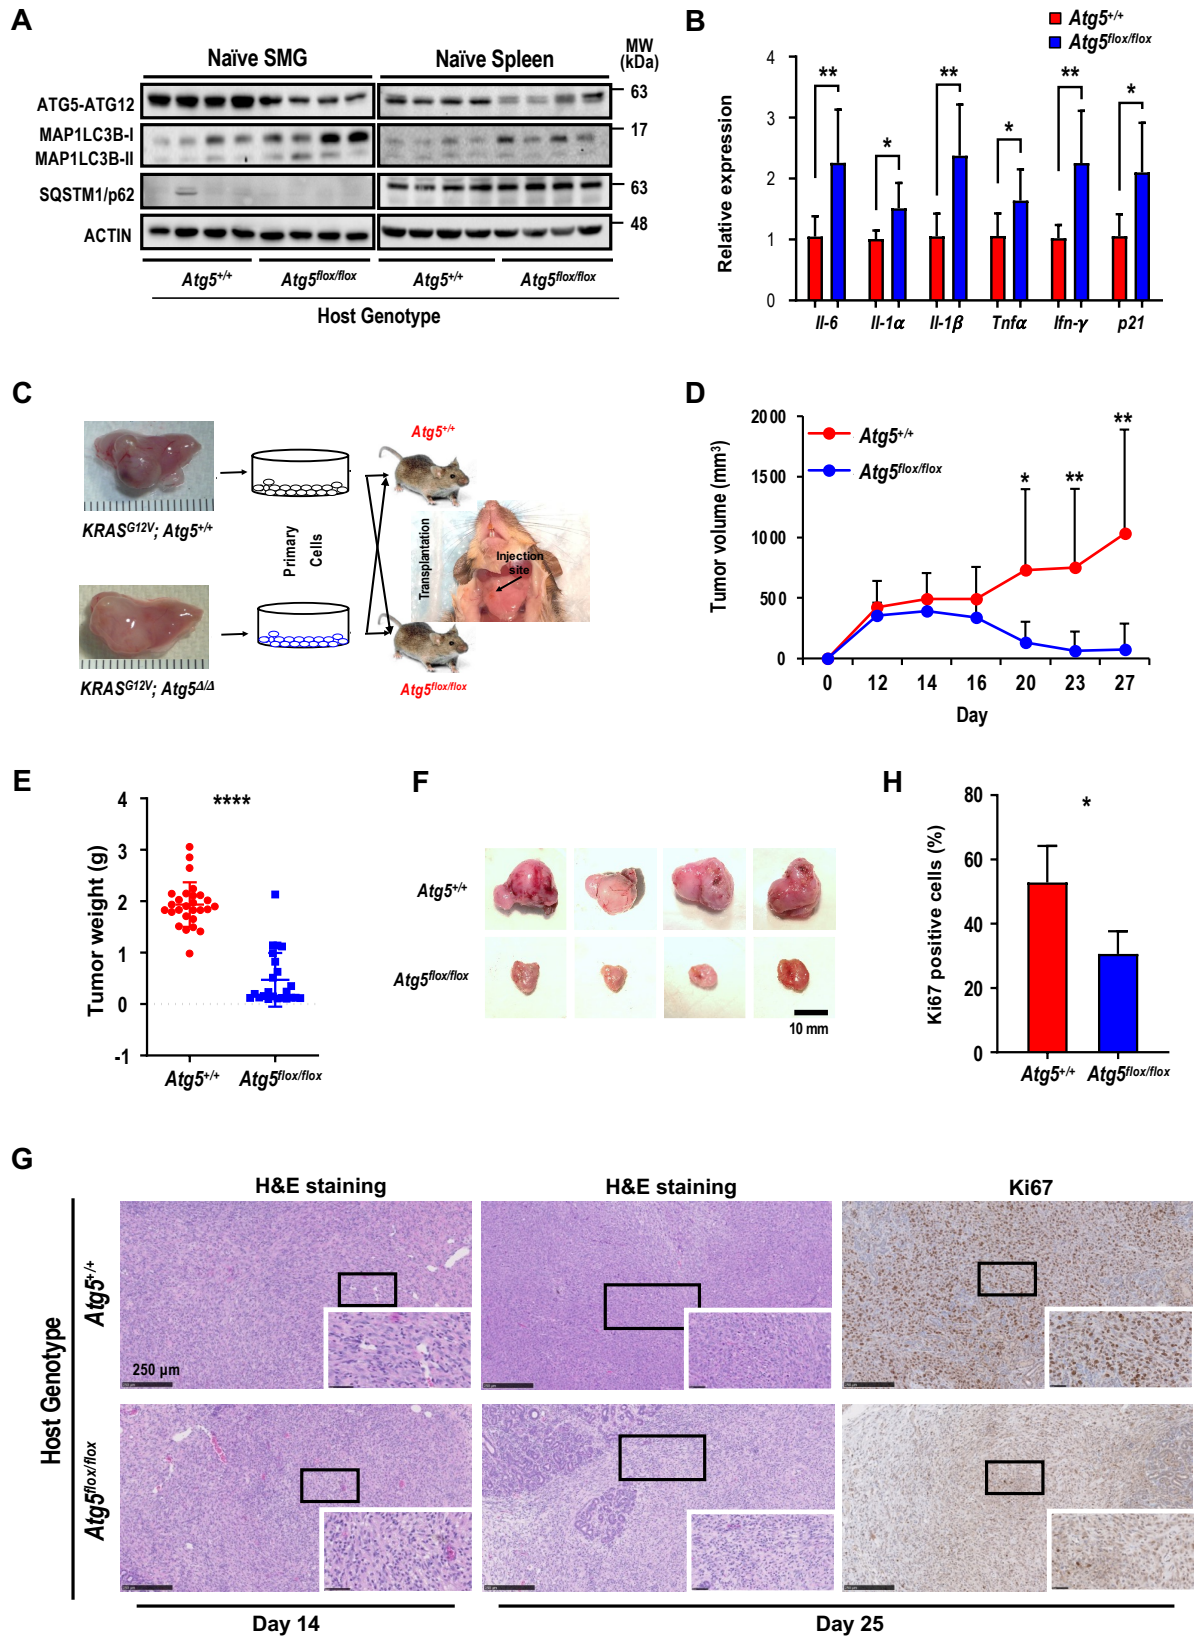

Fig. 1

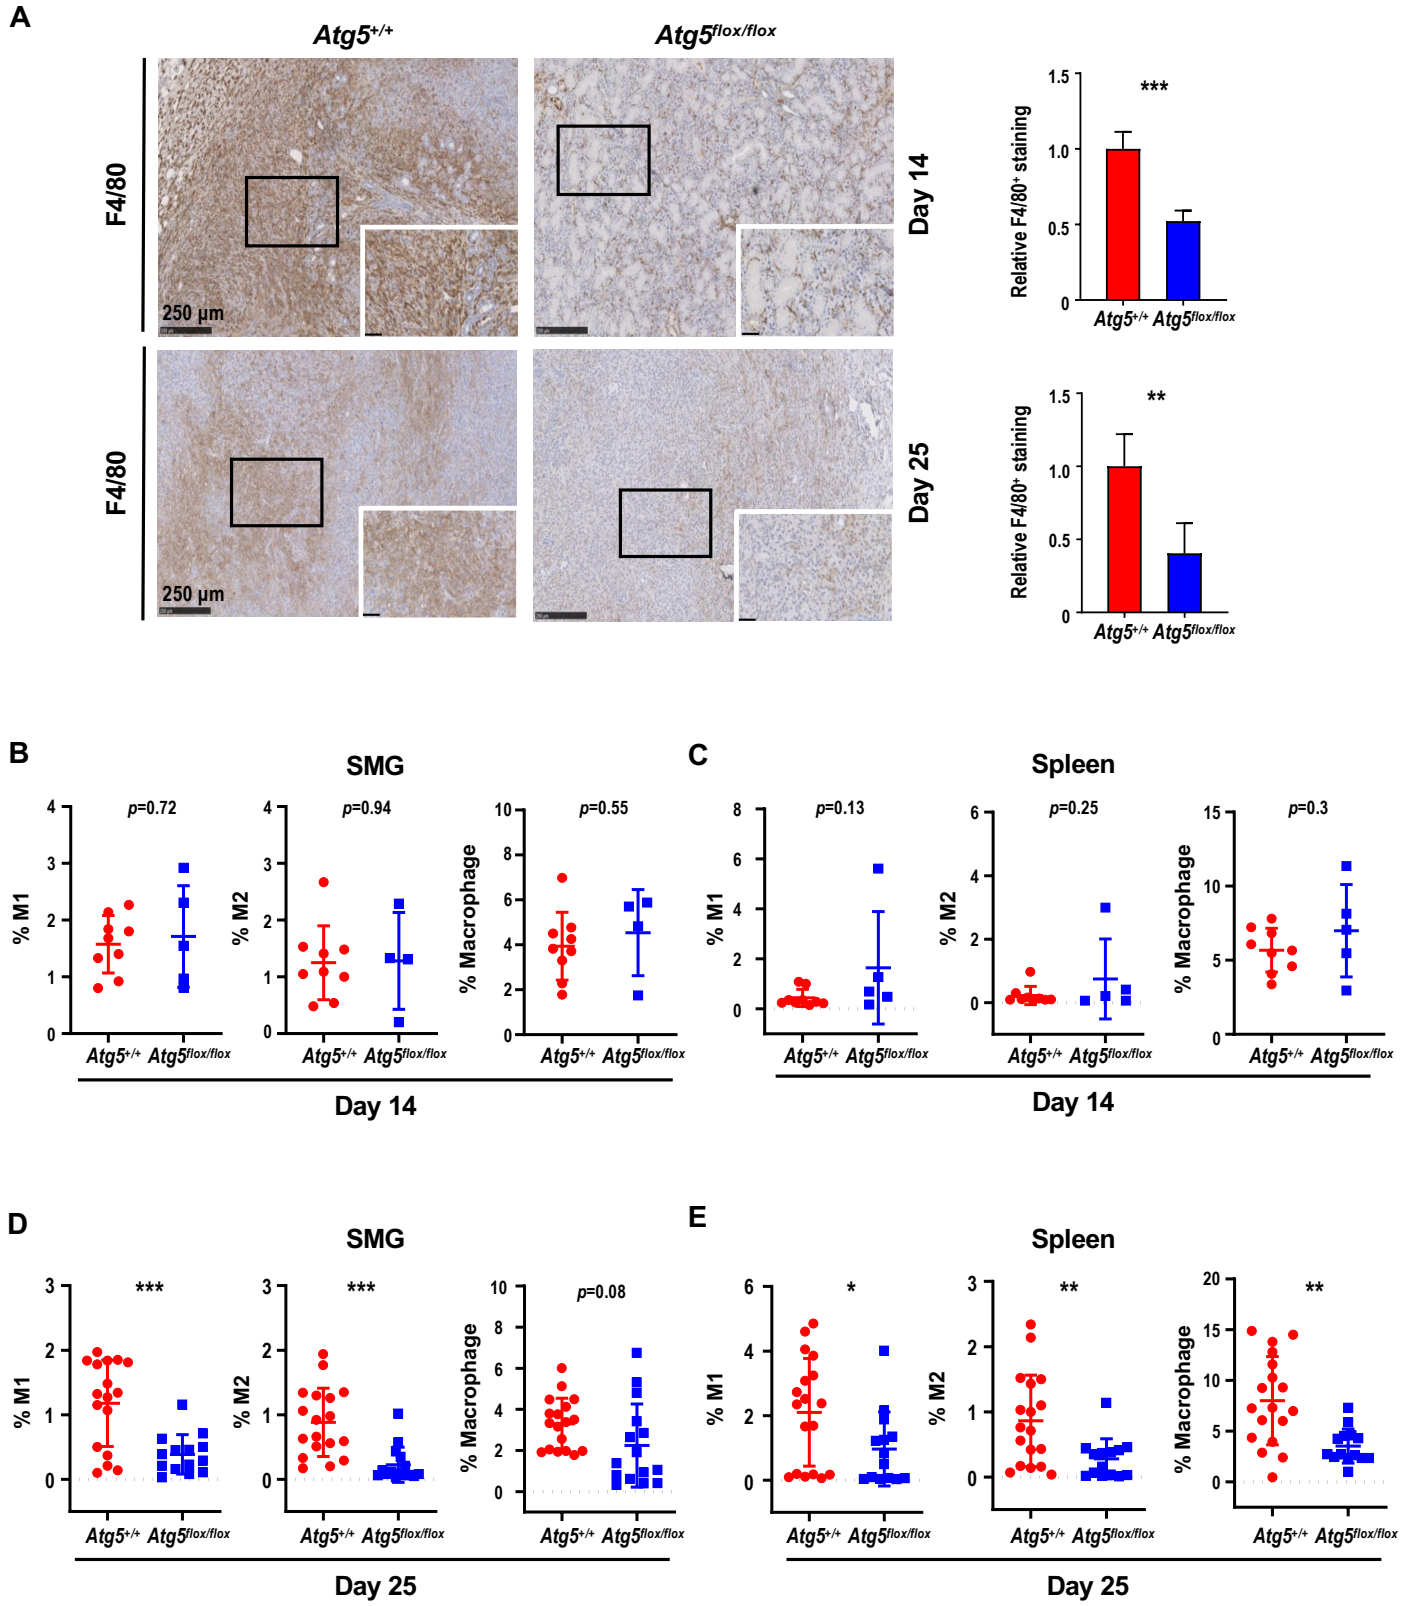

Fig. 2

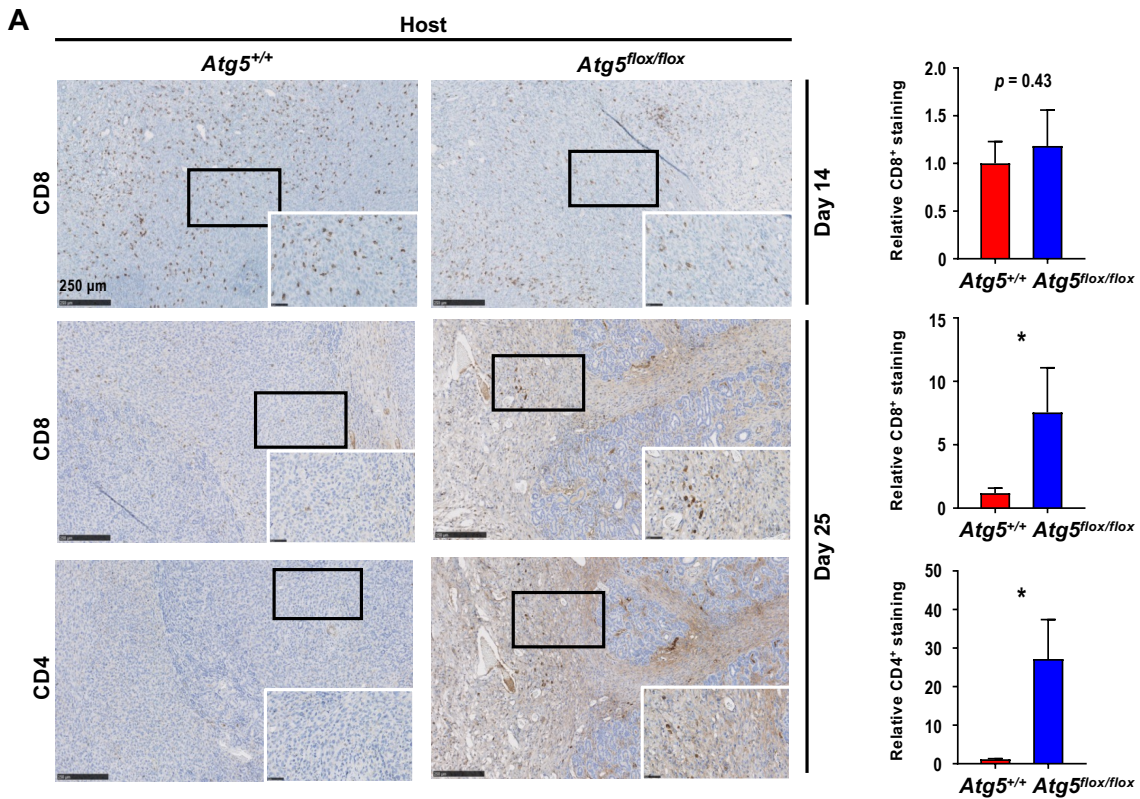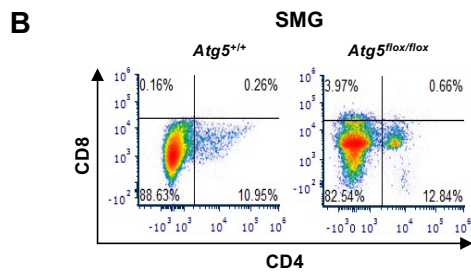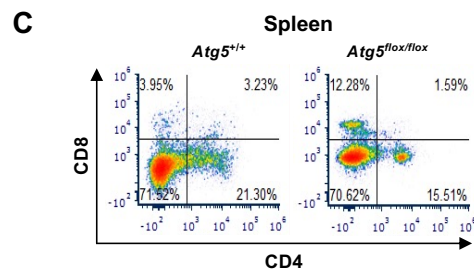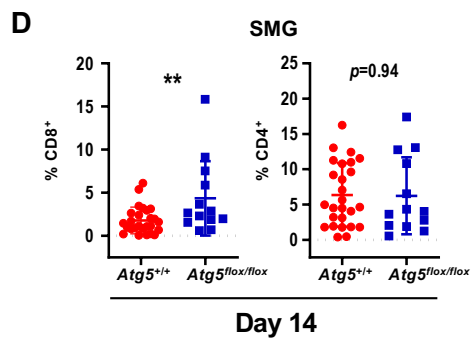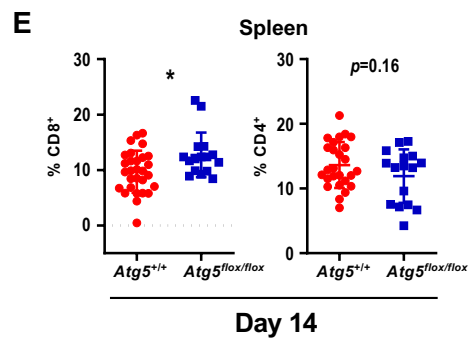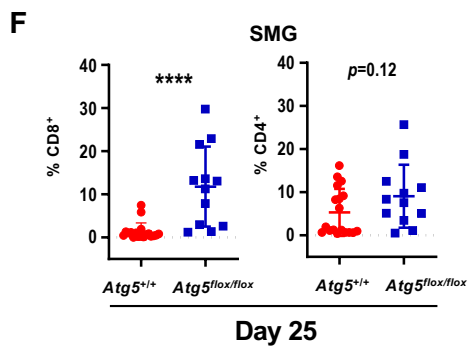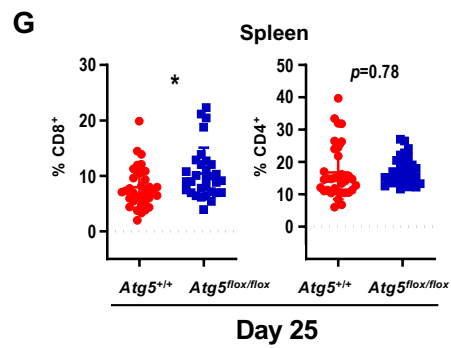

Fig. 3

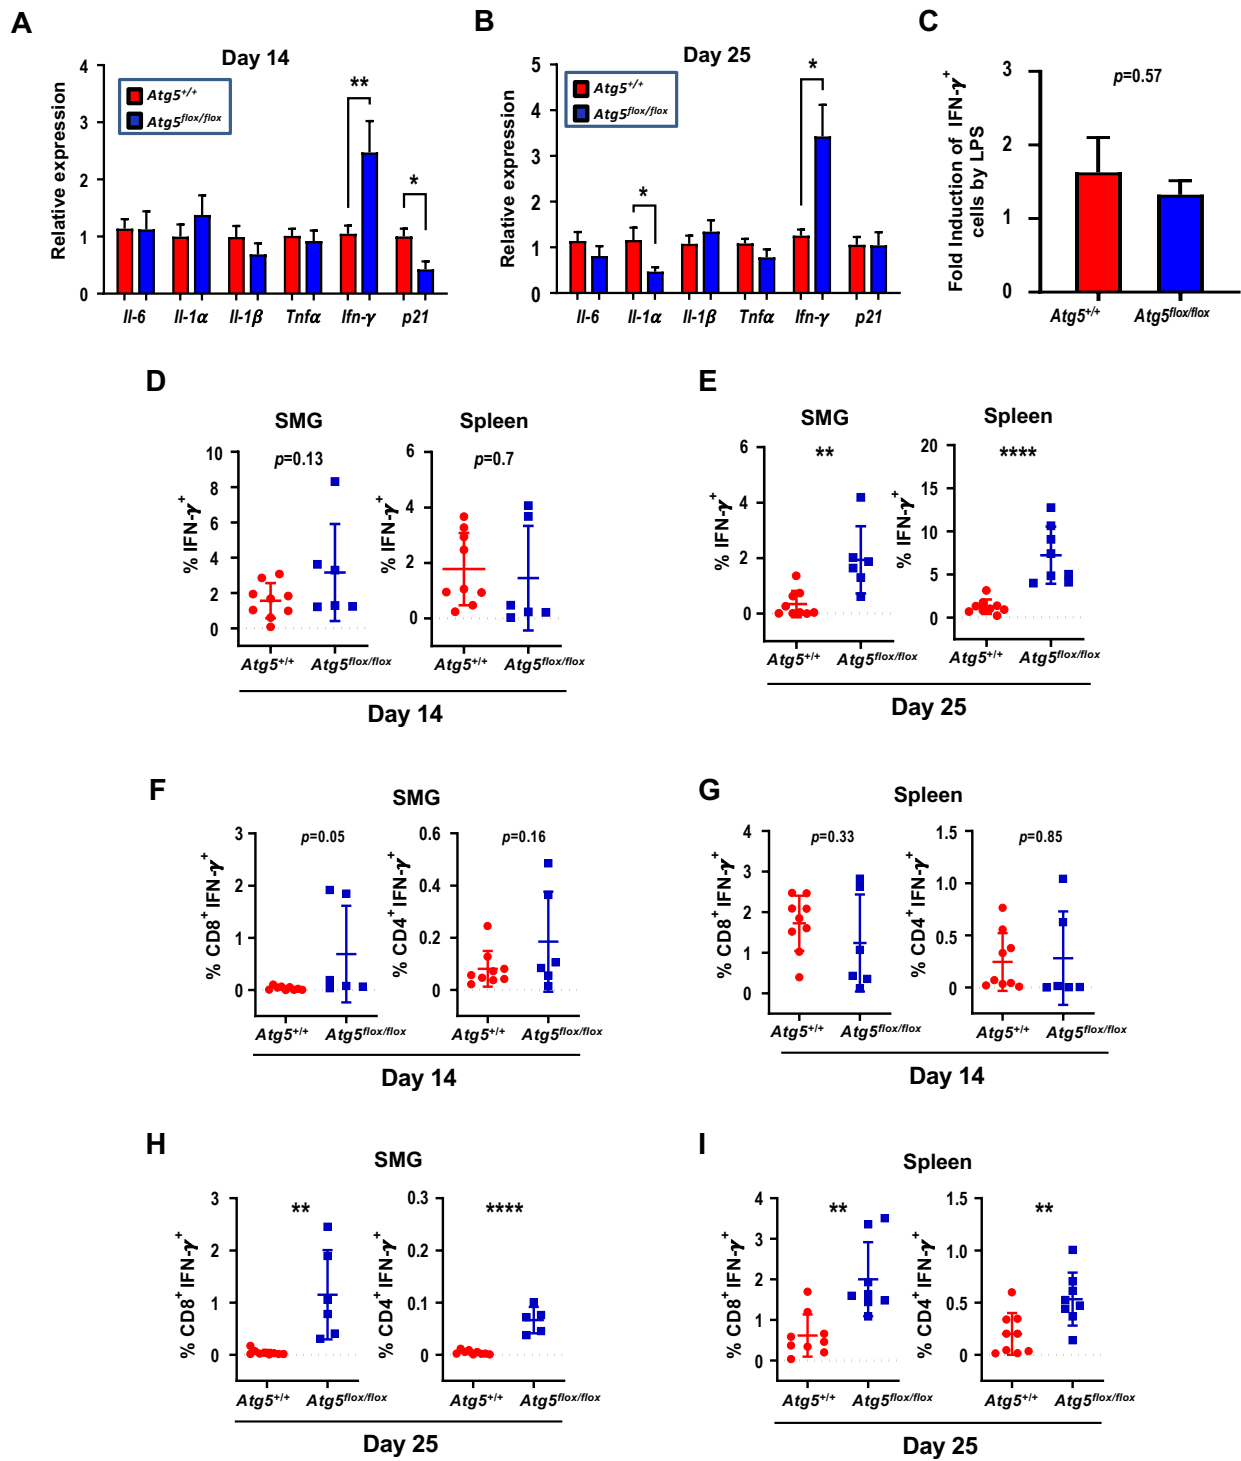

Fig. 4

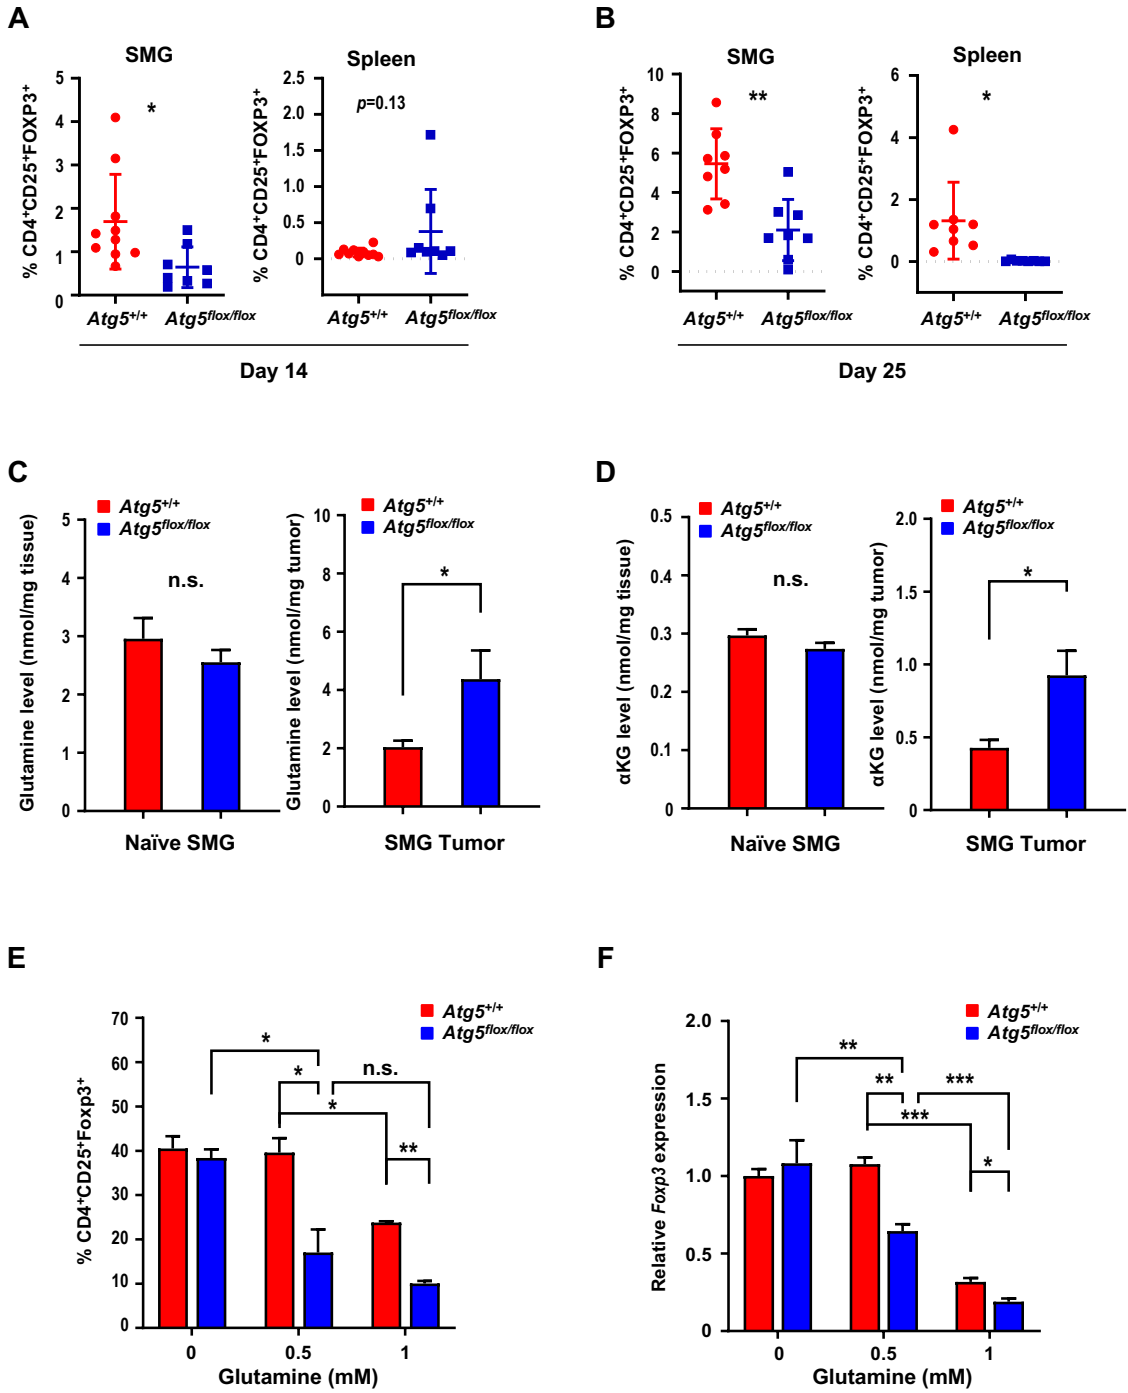

Fig. 5

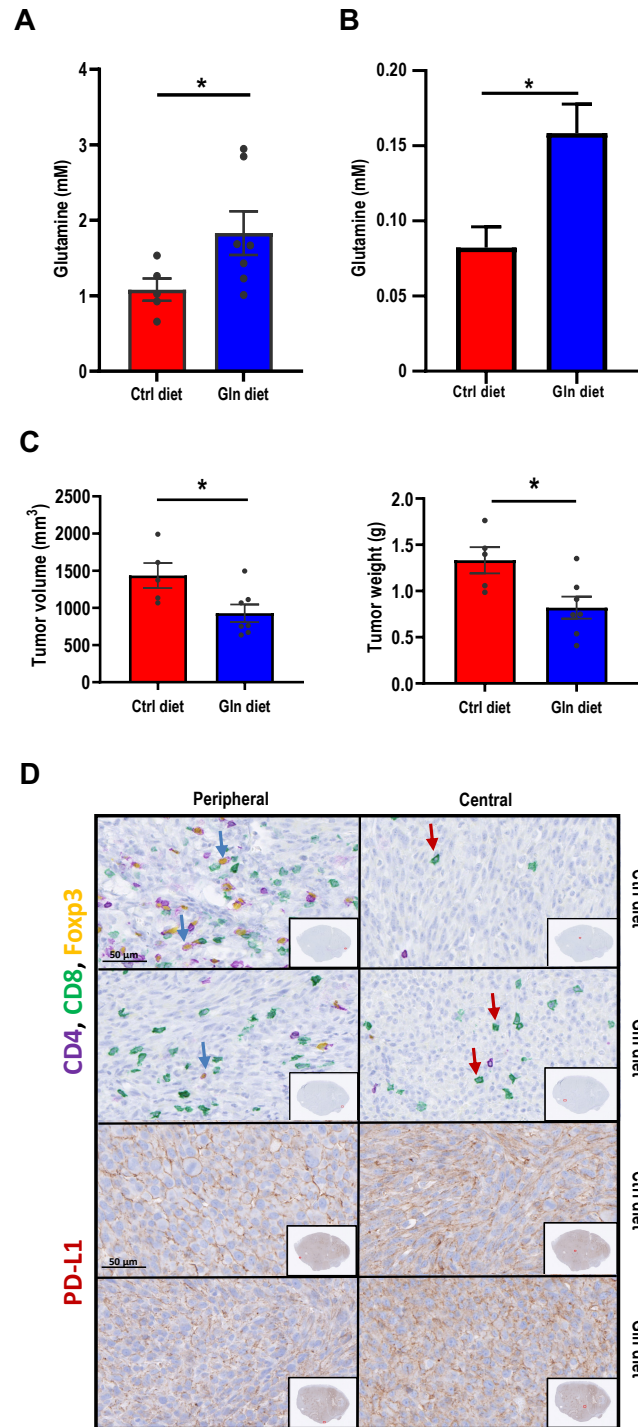

**Fig. 6**
